# Supplementary material for: Design, synthesis, and evaluation of curcumin analogues as potential inhibitors of bacterial sialidase
Source: PubMed Central journal article supplement (PMC6104608; doi:10.1080/14756366.2018.1488695), 2018-08-21
Supplement: IENZ_A_1488695_SM0829.pdf [file IENZ_A_1488695_SM0829.pdf]

## Electronic Supplementary Information

# Design, synthesis, and evaluation of curcumin analogues as potential inhibitors of bacterial sialidase

Bo Ram Kim <sup>a, †</sup>, Ji-Young Park <sup>b, †</sup>, Hyung Jae Jeong <sup>a</sup>, Hyung-Jun Kwon <sup>b</sup>, Su-Jin Park <sup>b</sup>, In-Chul Lee

<sup>b</sup>, Young Bae Ryu <sup>b, \*</sup>, Woo Song Lee <sup>b, \*</sup>

### *Affiliation*

<sup>a</sup> *Bio-processing Technology Development and Support Team, Korea Research Institute of Bioscience and Biotechnology, Jeongseup 56212, Republic of Korea*

<sup>b</sup> *Natural Product Material Research Center, Korea Research Institute of Bioscience and Biotechnology, Jeongseup 56212, Republic of Korea*

\* Corresponding authors at: Natural Product Material Research Center, Korea Research Institute of Bioscience and Biotechnology, Jeongseup 580-185, Republic of Korea. Tel: +82 63 570 5170; Fax: +82 63 570 5239(W.S. Lee), Tel: +82 63 570 5171 (Y.B. Ryu). E-mail address: wslee@kribb.re.kr (W.S. Lee) and [ybryu@kribb.re.kr](mailto:ybryu@kribb.re.kr) (Y.B. Ryu).

<sup>†</sup>Both authors contributed equally to the work.

## Contents of Supplementary Information

### 1. Characterization data

- $^1\text{H}$  and  $^{13}\text{C}$  NMR spectrum of curcumins (pp. S3 – S29)

### 2. Preparation of enzyme

- Sequence data of prepared enzymes (pp. S30-S31)
- Michaelis-Menten plots and Lineweaver-Burk plot of *S. pneumoniae* NanA  $K_m$  values (pp. S32)

### 3. Bioassay plots

- Lineweaver-Burk and Dixon plots of the compound **4a**, **4e**, **5q** and **5e** (pp. S33 – S34)

# 1. <sup>1</sup>H and <sup>13</sup>C NMR spectrum of curcumins

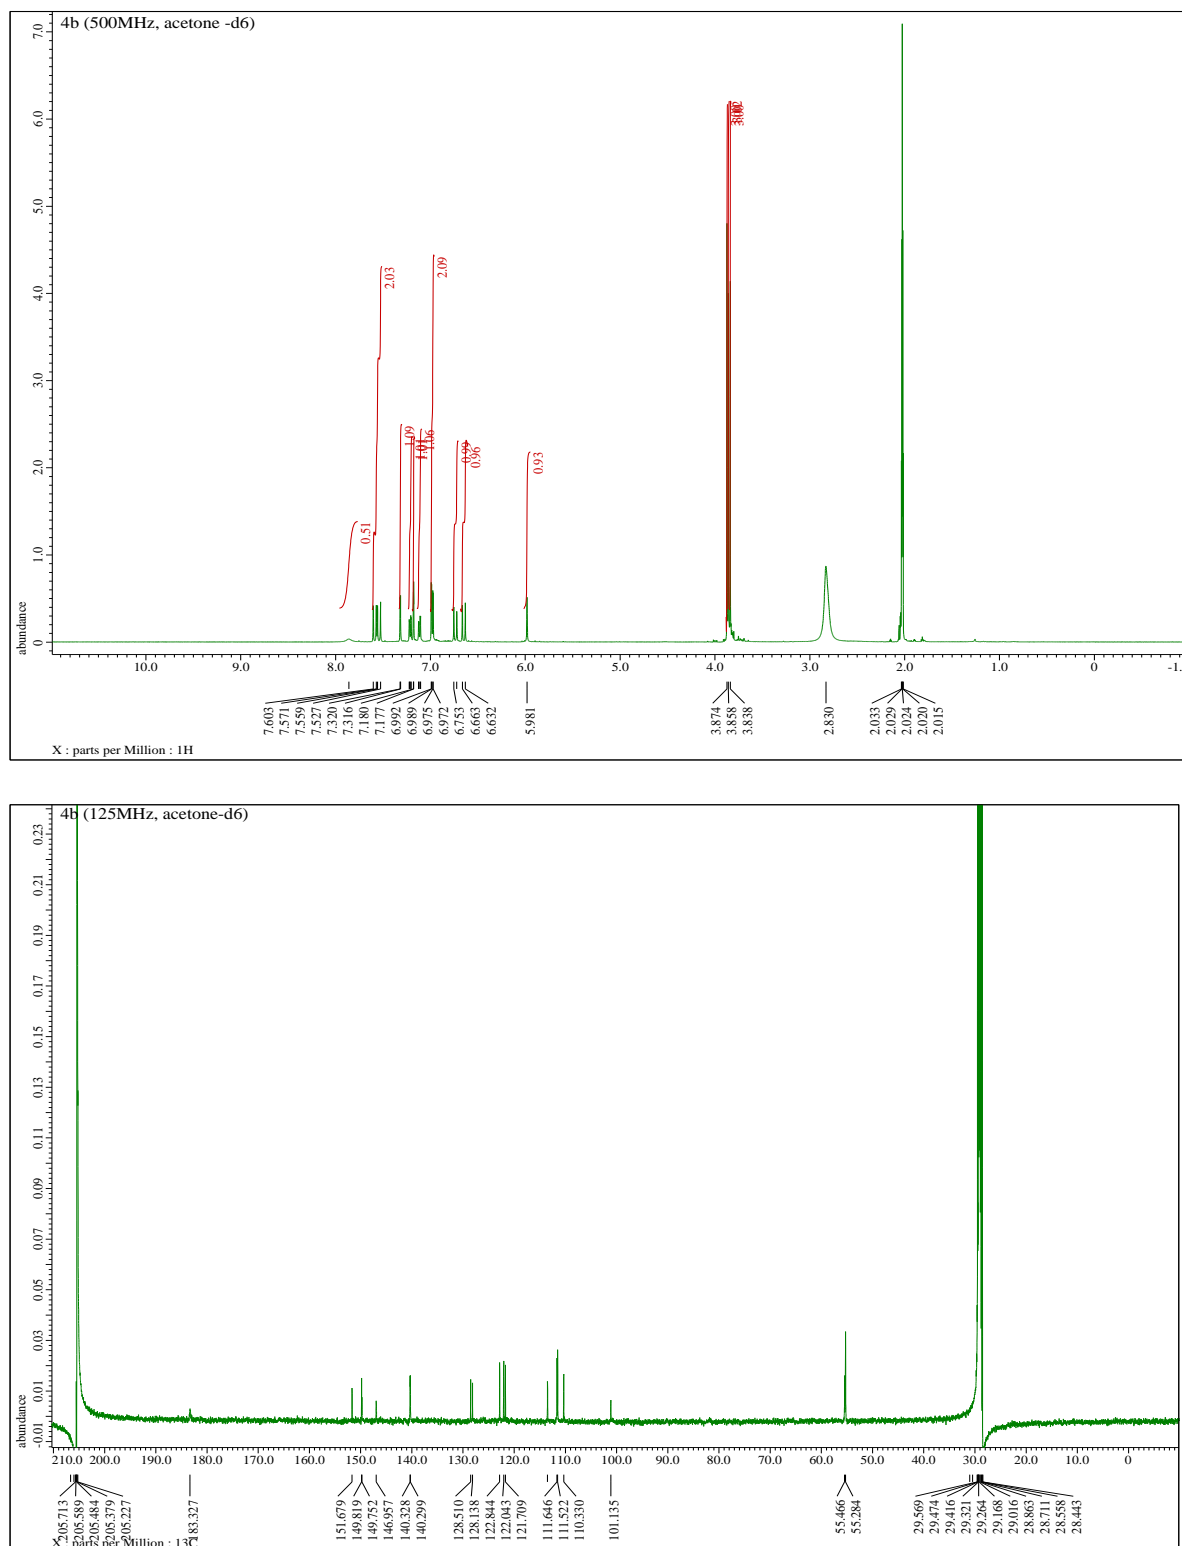

Figure S1. <sup>1</sup>H (top) and <sup>13</sup>C NMR (bottom) spectra in acetone-d<sub>6</sub> of **4b**

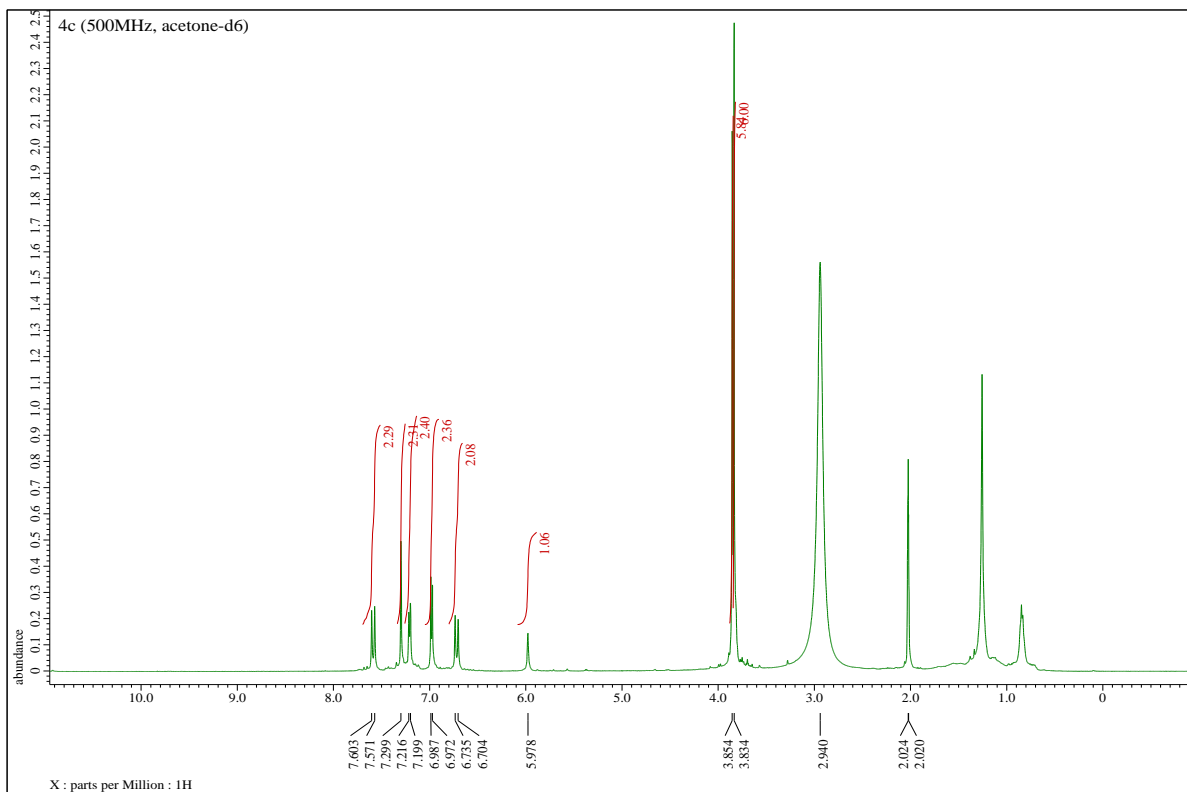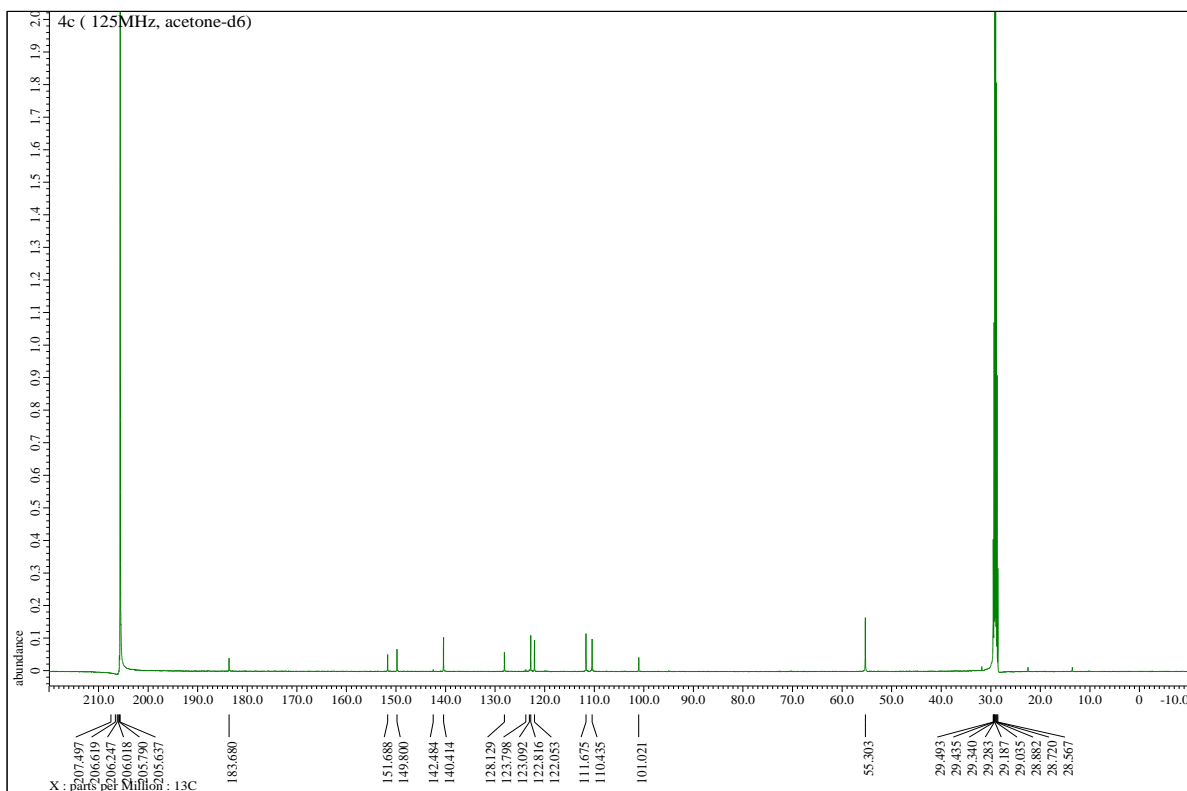

**Figure S2.**  $^1\text{H}$  (top) and  $^{13}\text{C}$  NMR (bottom) spectra in acetone- $d_6$  of **4c**

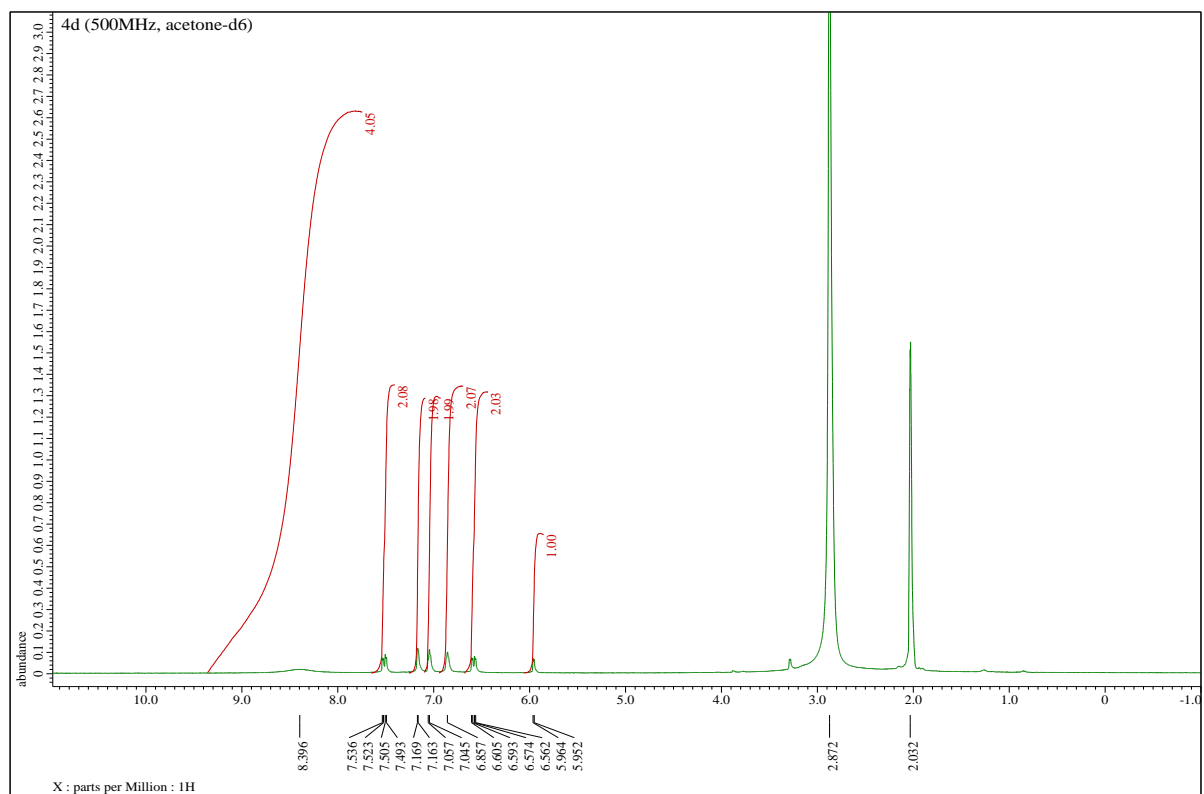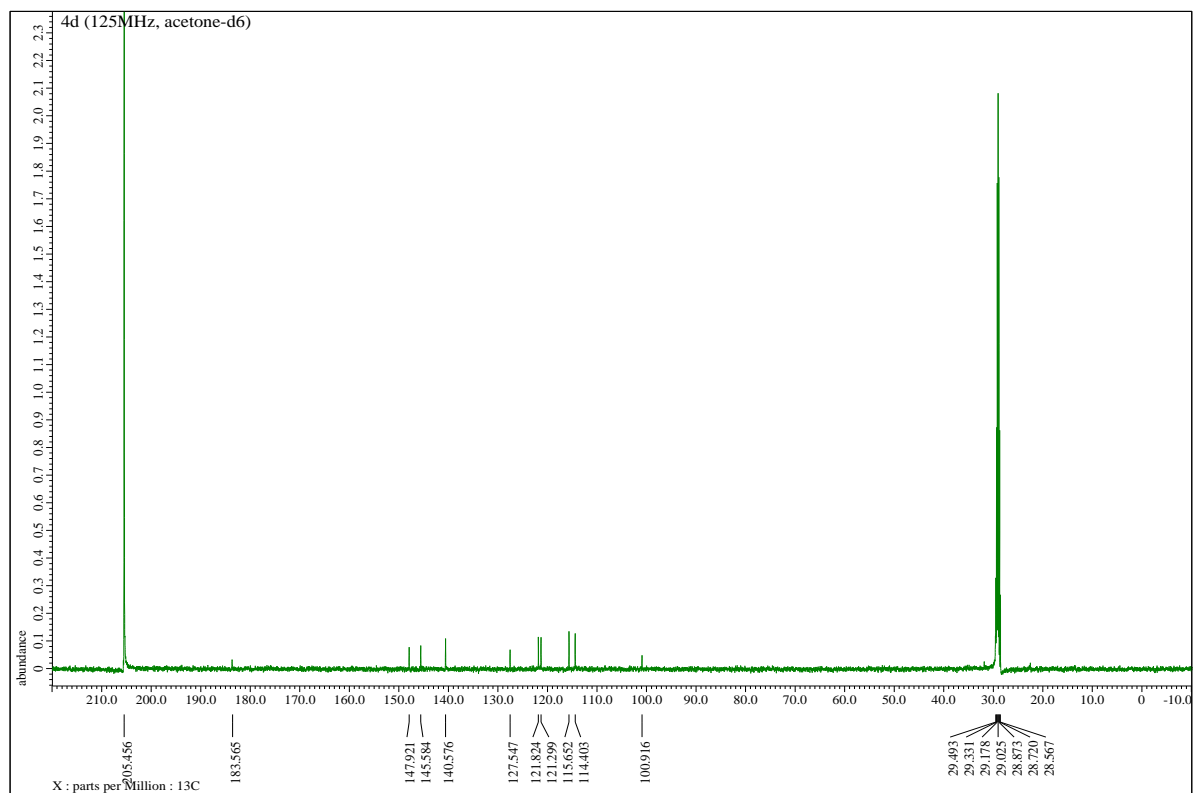

**Figure S3.**  $^1\text{H}$  (top) and  $^{13}\text{C}$  NMR (bottom) spectra in acetone- $d_6$  of **4d**

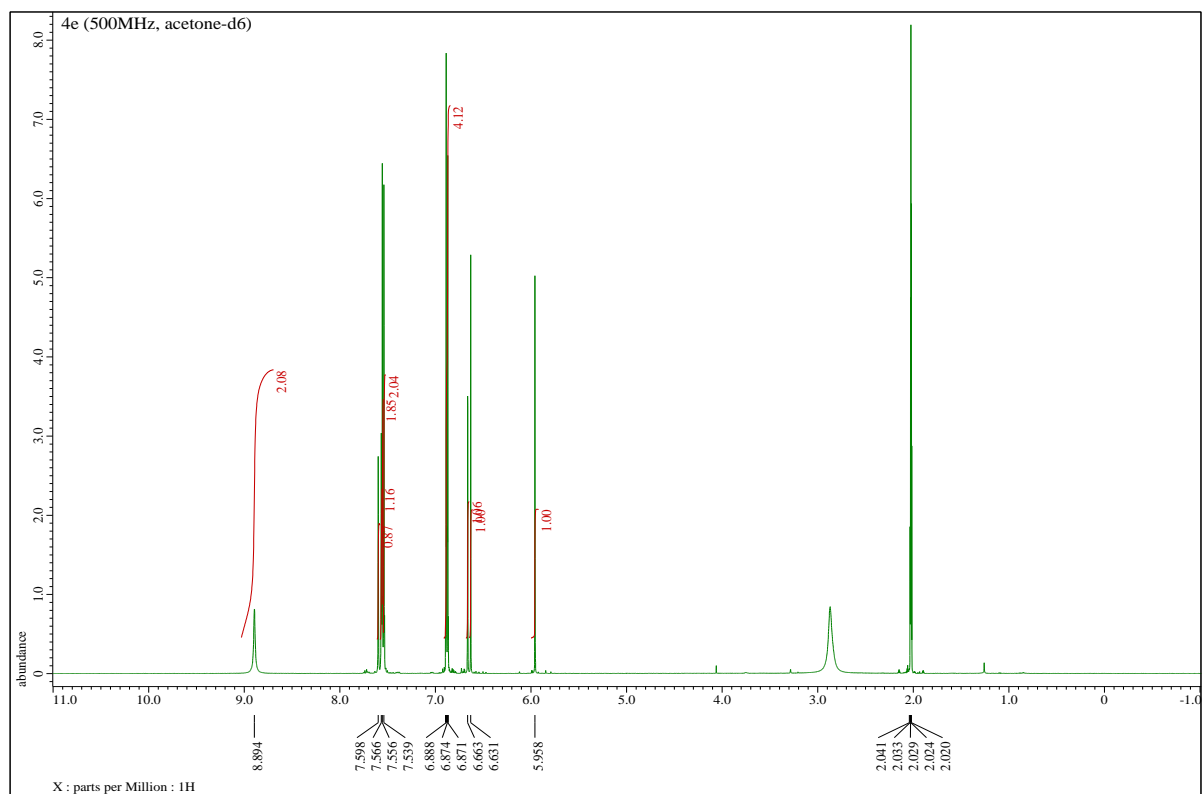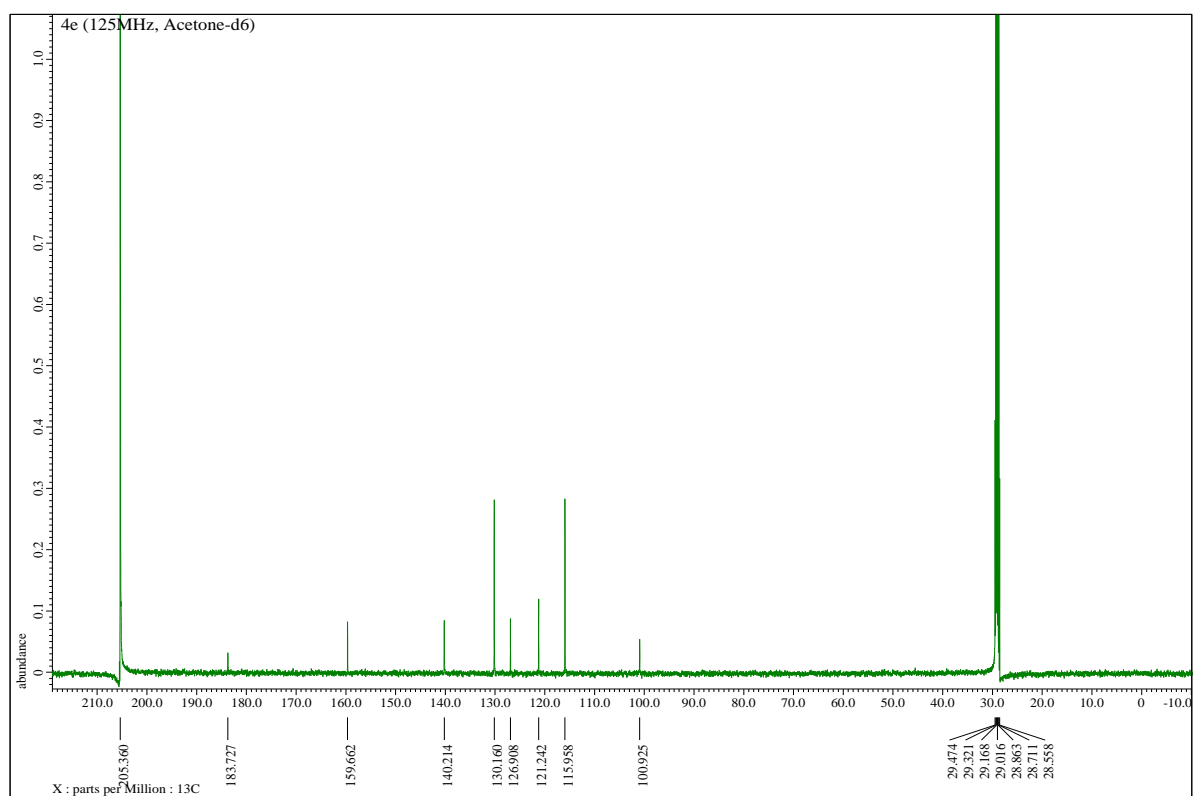

**Figure S4.**  $^1\text{H}$  (top) and  $^{13}\text{C}$  NMR (bottom) spectra in acetone- $d_6$  of **4e**

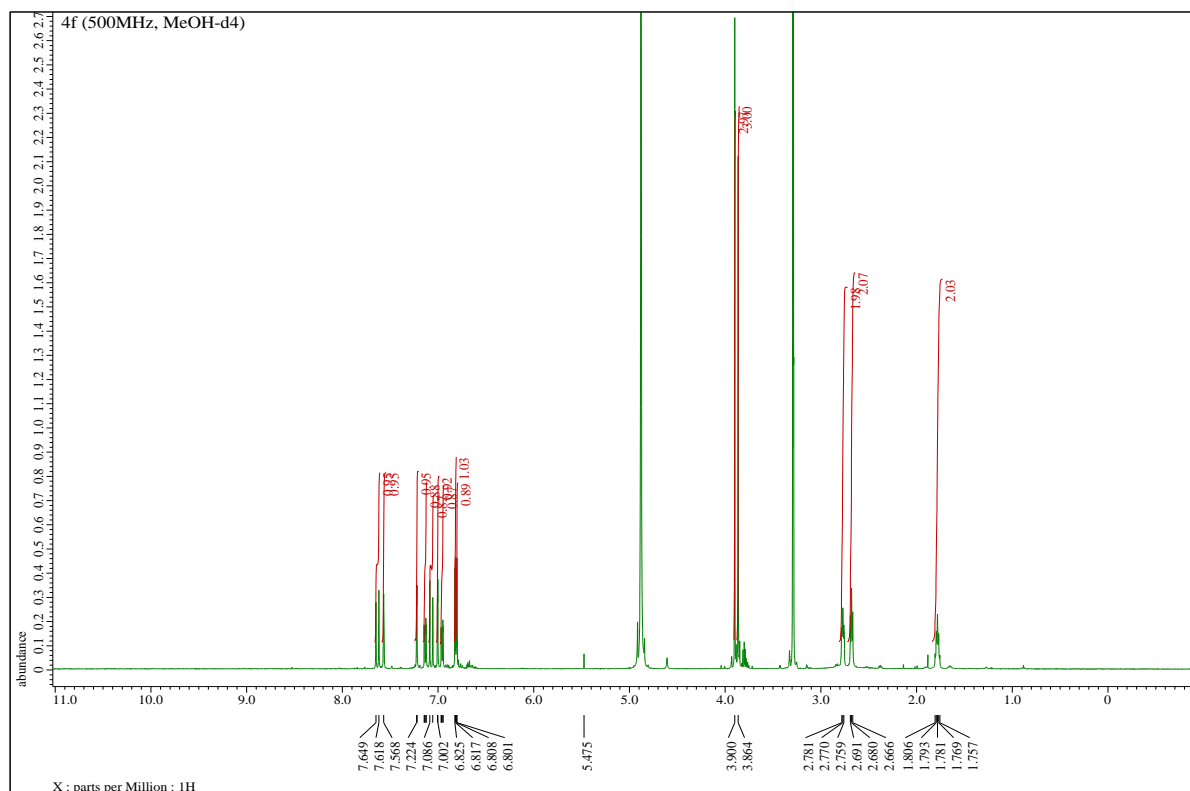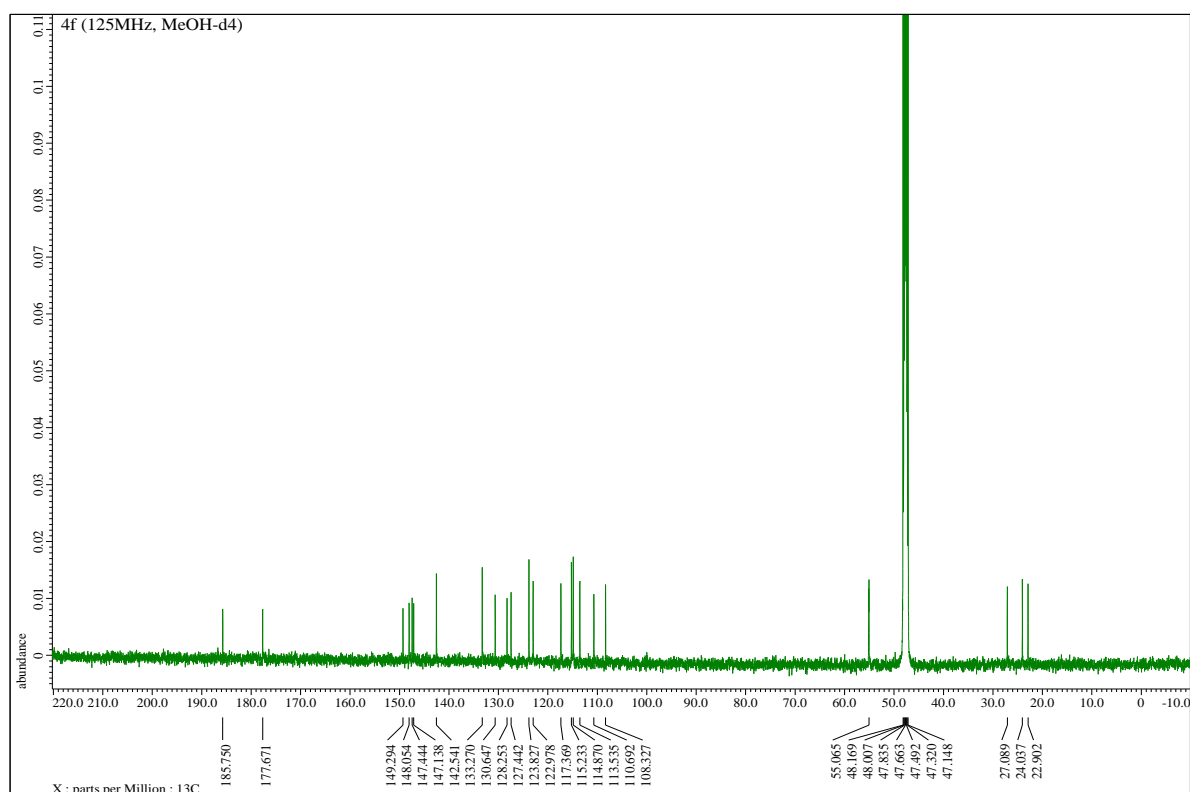

Figure S5.  $^1\text{H}$  (top) and  $^{13}\text{C}$  NMR (bottom) spectra in acetone- $d_6$  of **4f**

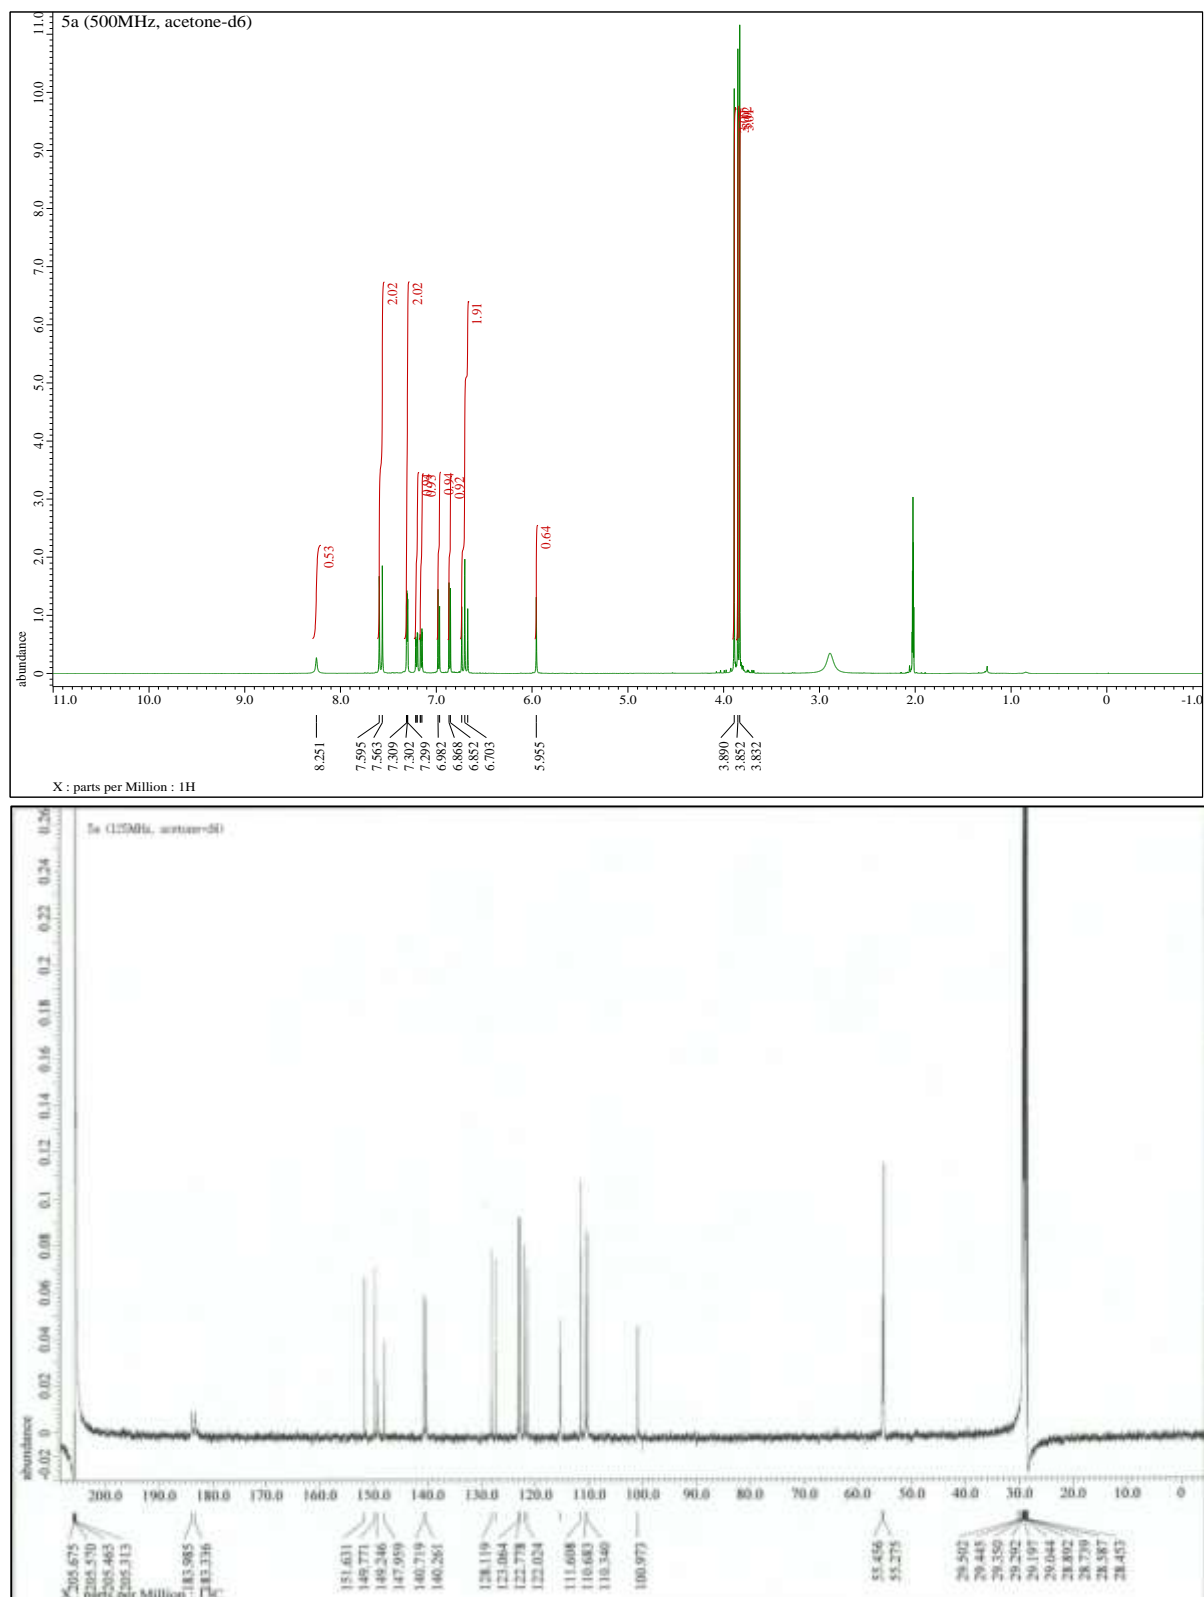



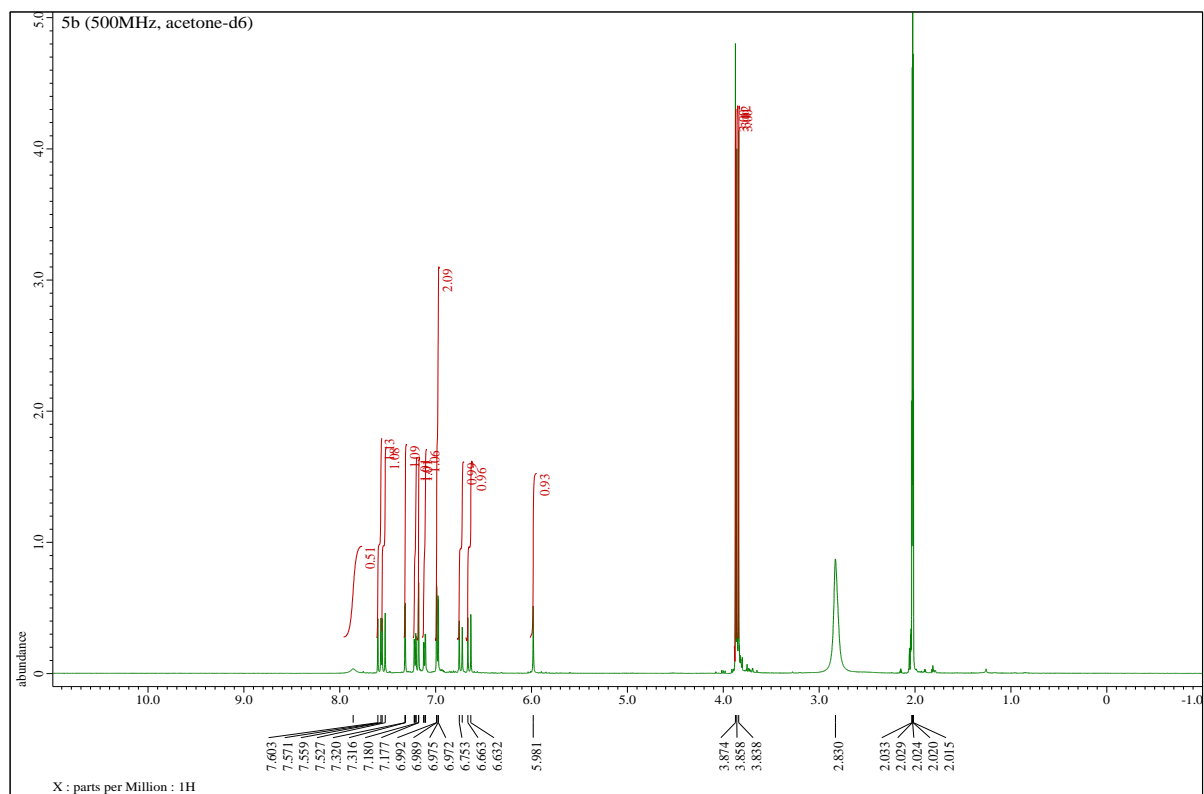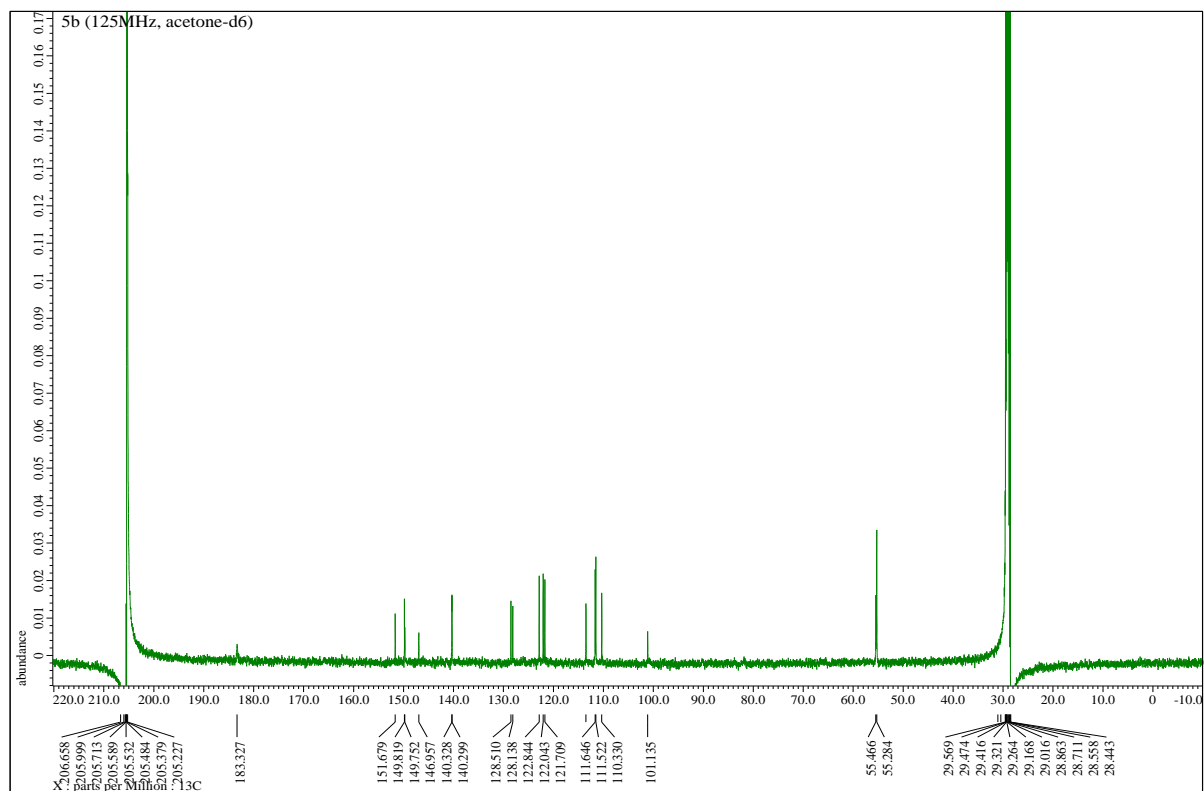

**Figure S7.**  $^1\text{H}$  (top) and  $^{13}\text{C}$  NMR (bottom) spectra in acetone- $d_6$  of **5b**

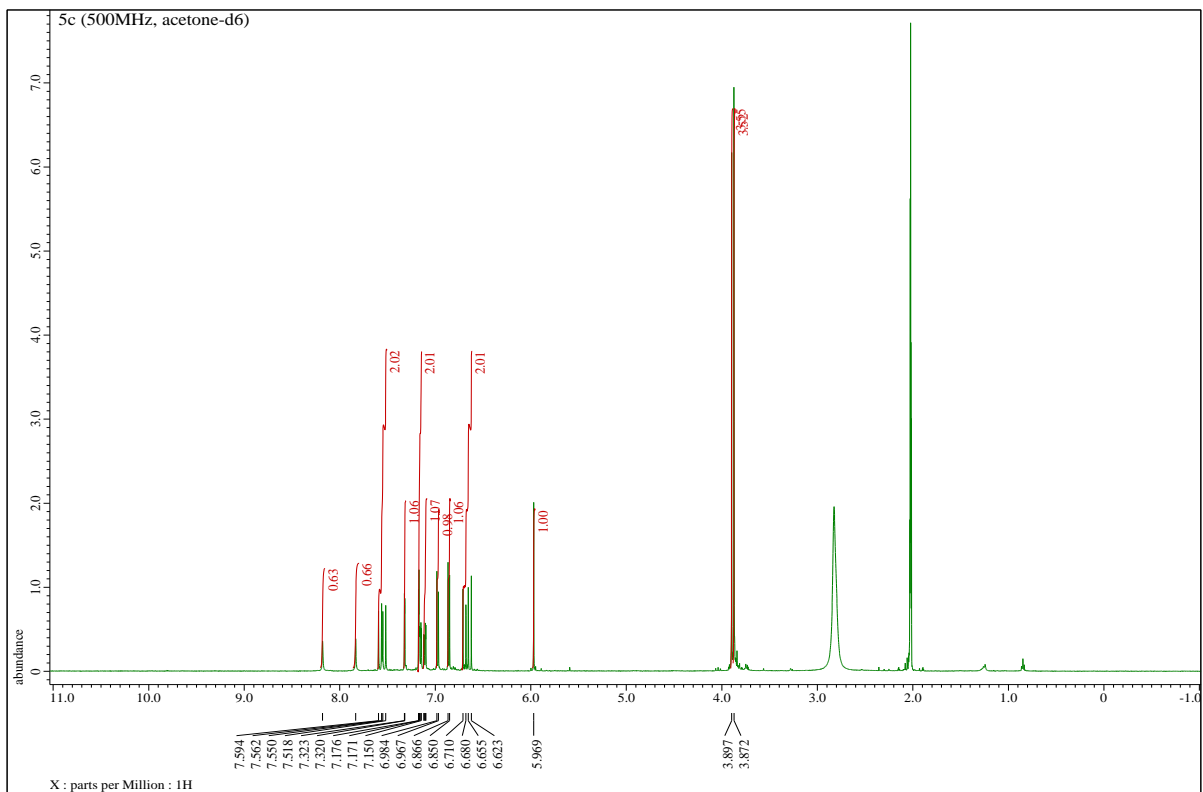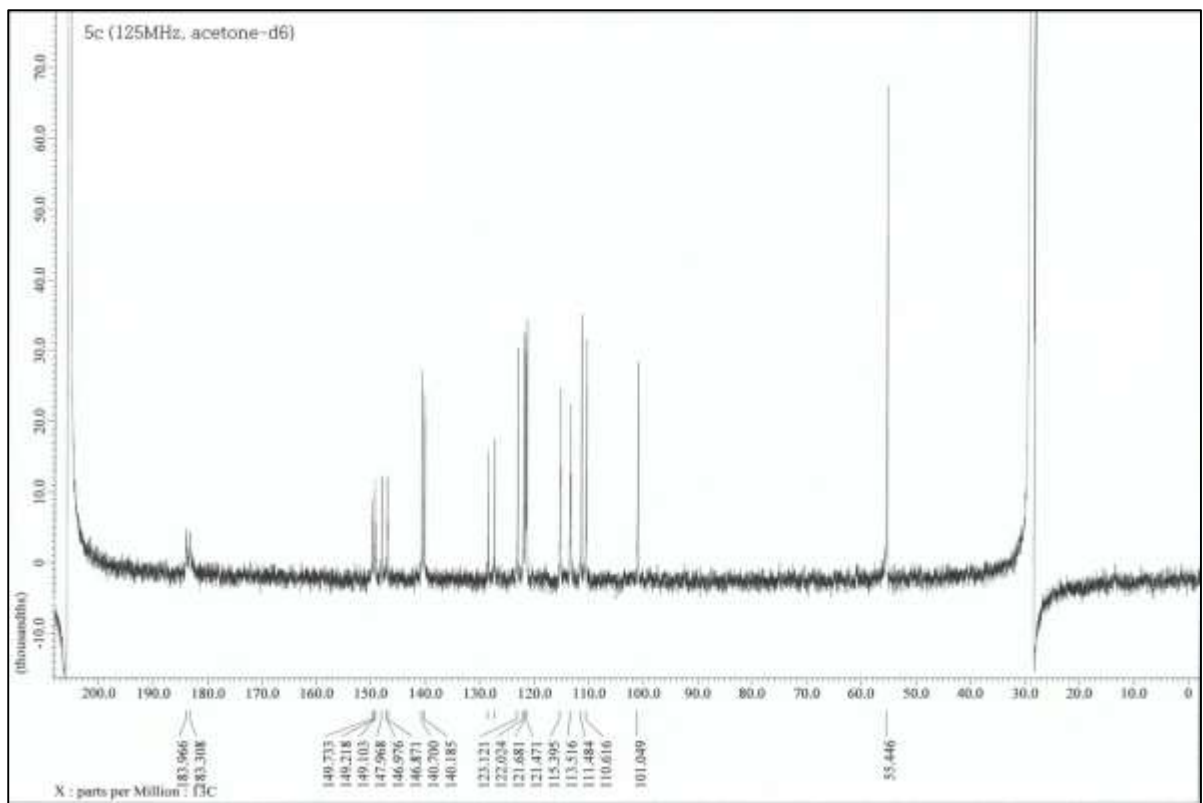

**Figure S8.**  $^1\text{H}$  (top) and  $^{13}\text{C}$  NMR (bottom) spectra in acetone- $d_6$  of **5c**

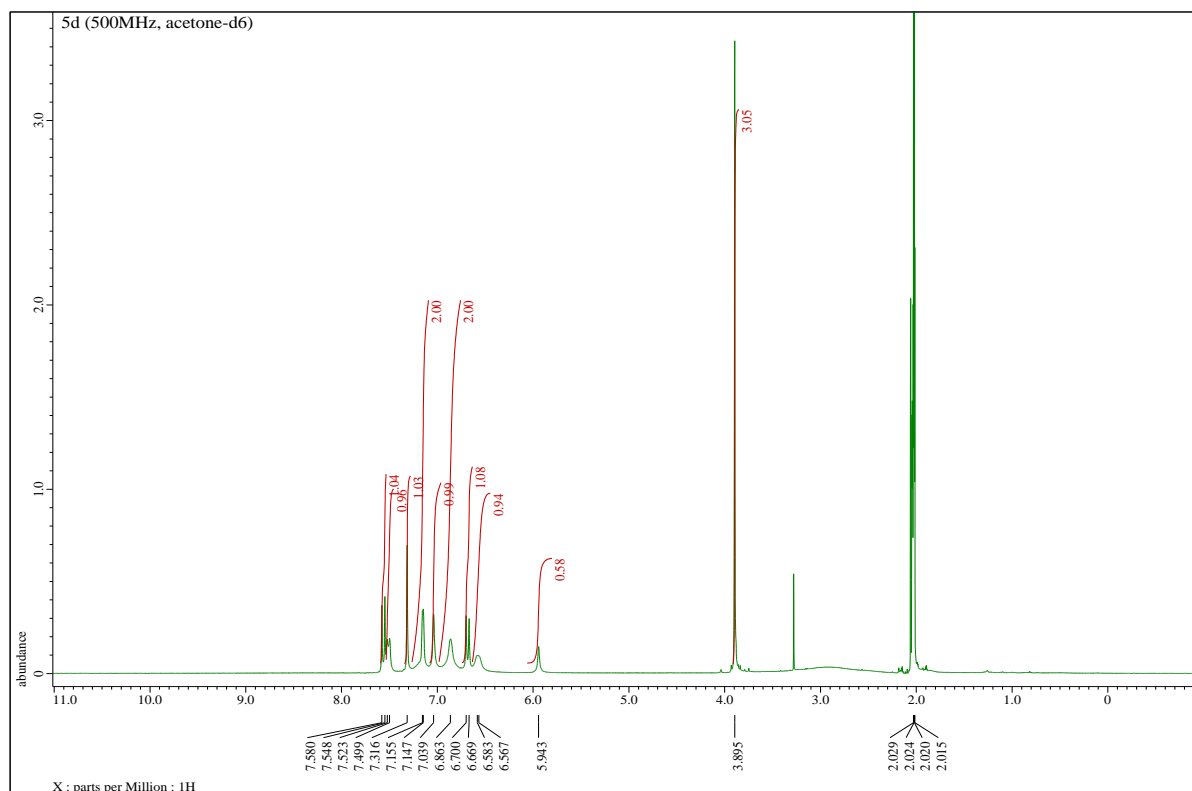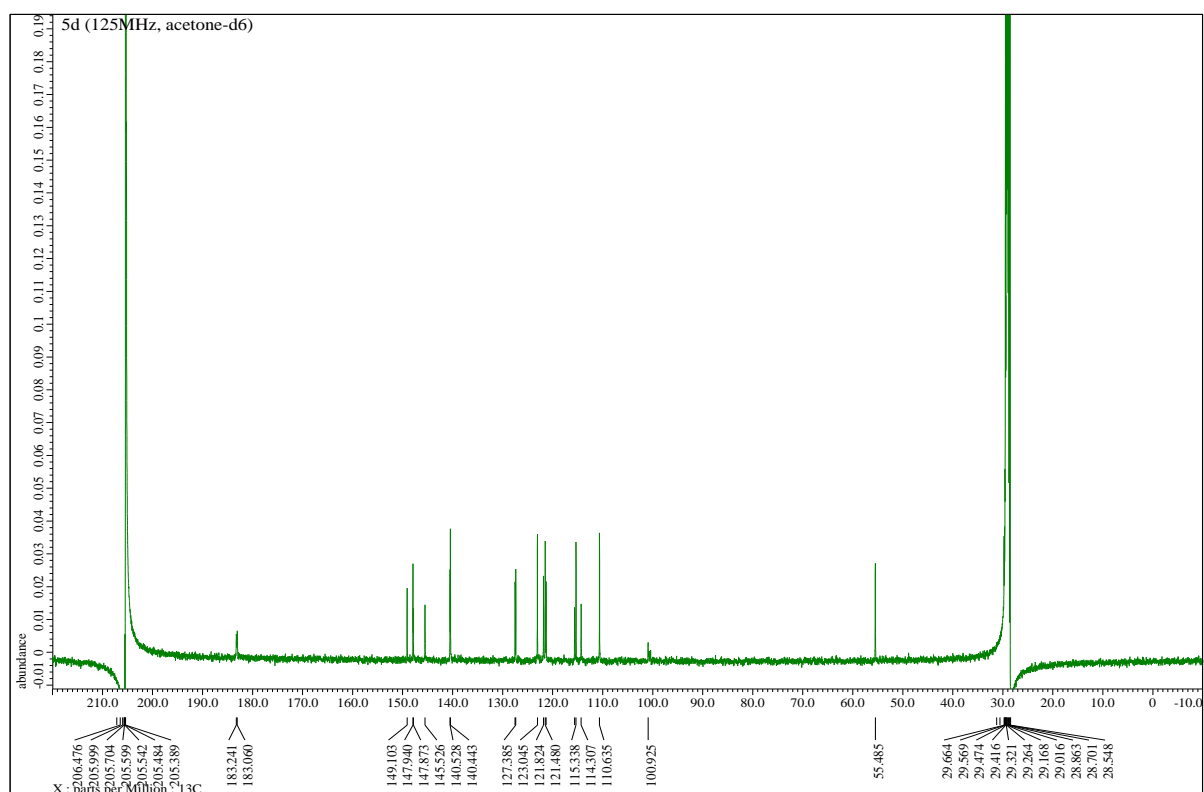

Figure S9.  $^1\text{H}$  (top) and  $^{13}\text{C}$  NMR (bottom) spectra in acetone- $d_6$  of **5d**

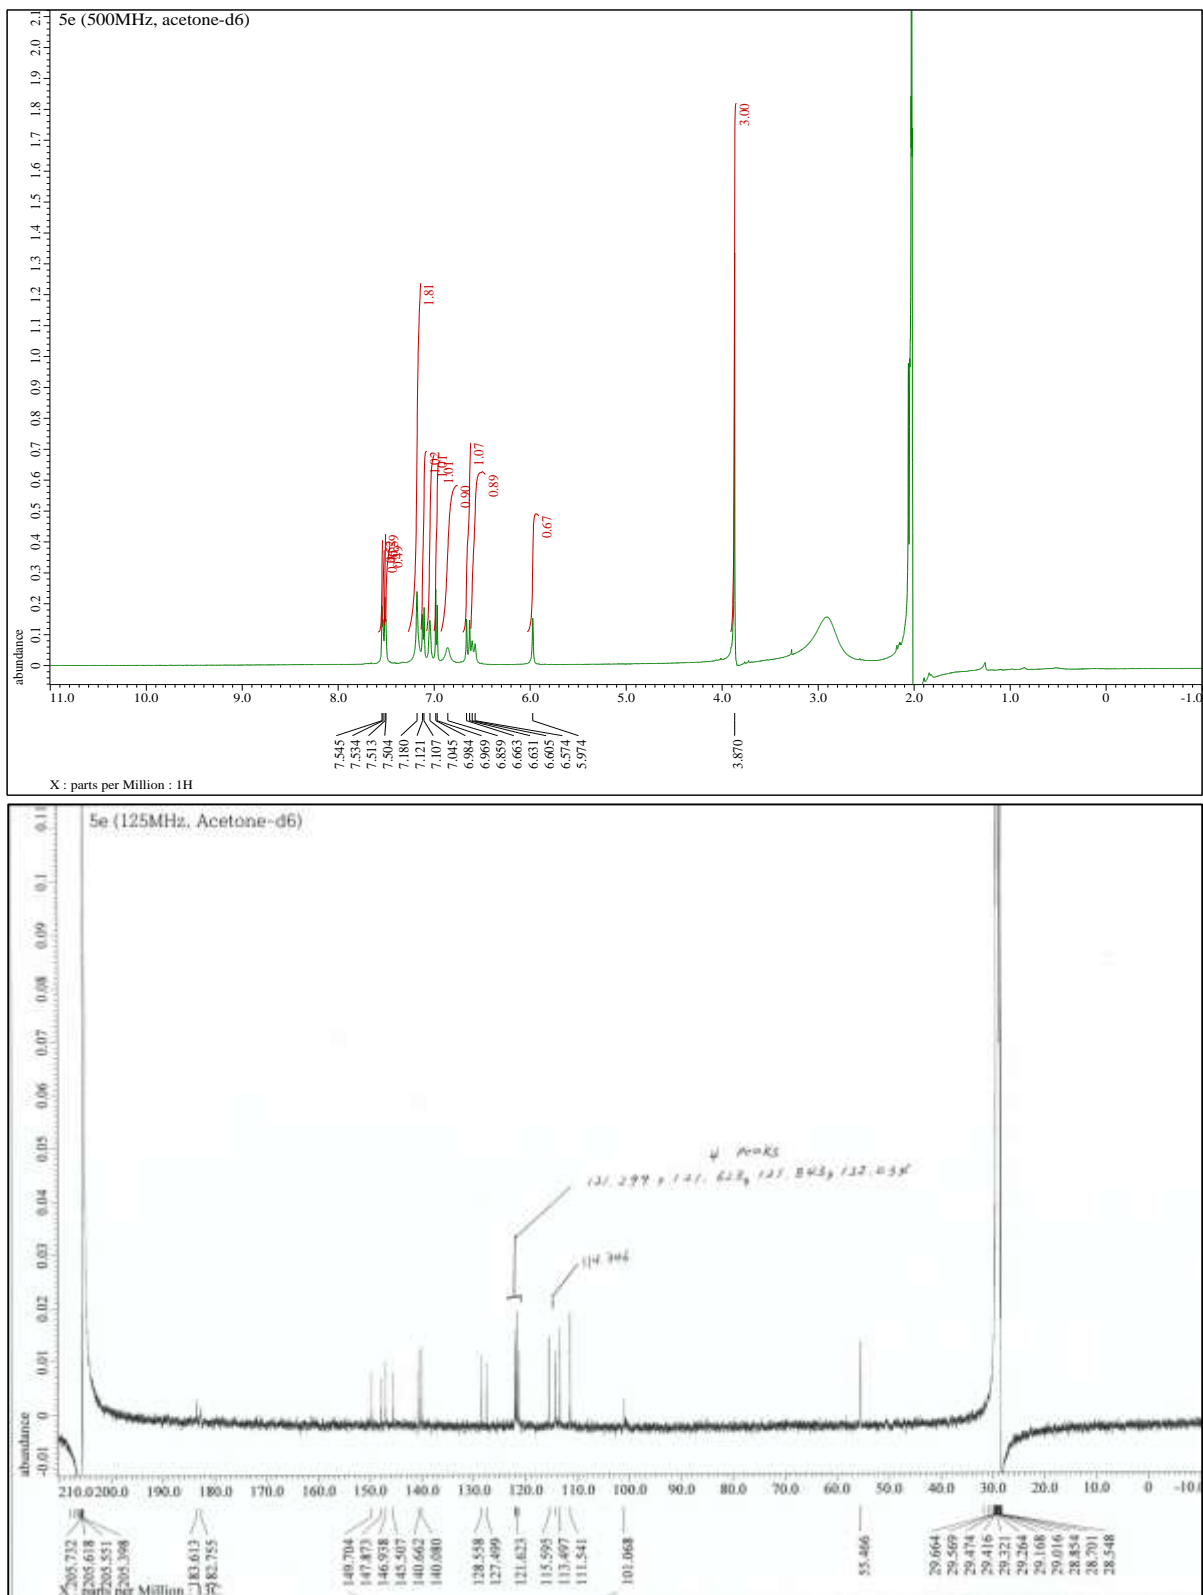

**Figure S10.**  $^1\text{H}$  (top) and  $^{13}\text{C}$  NMR (bottom) spectra in acetone- $d_6$  of **5e**

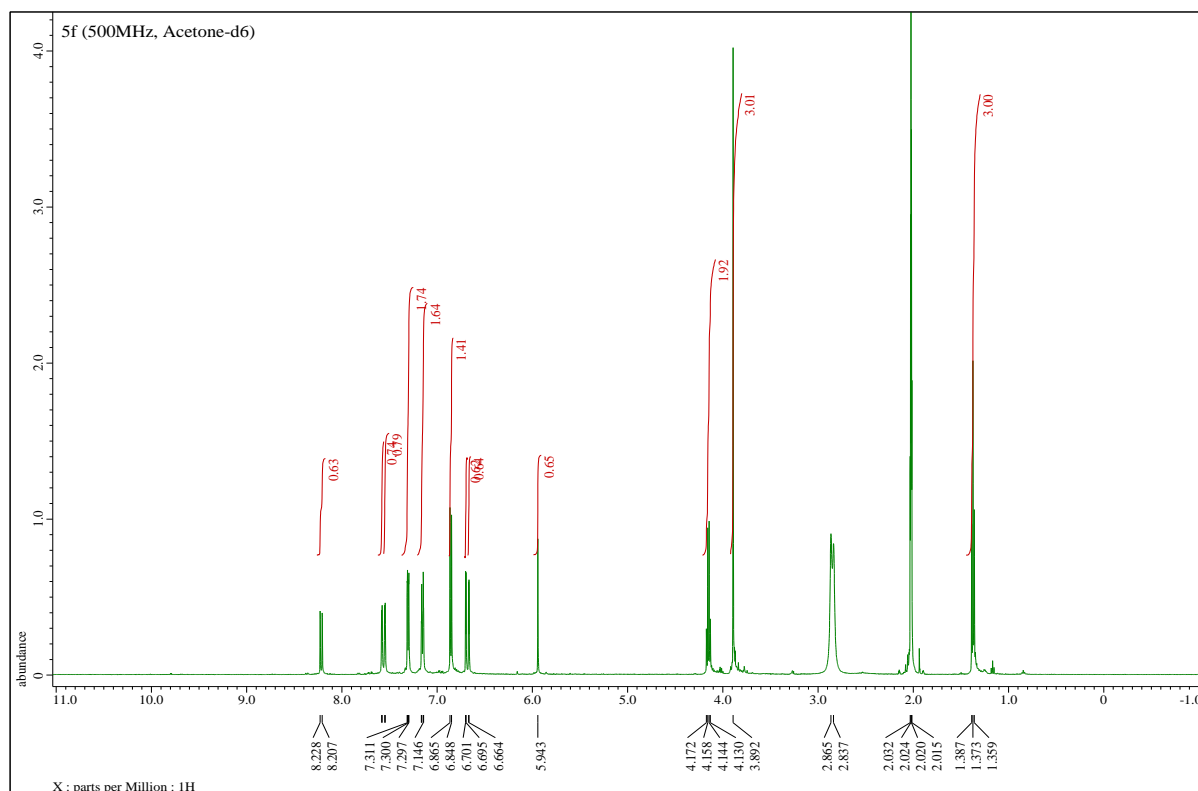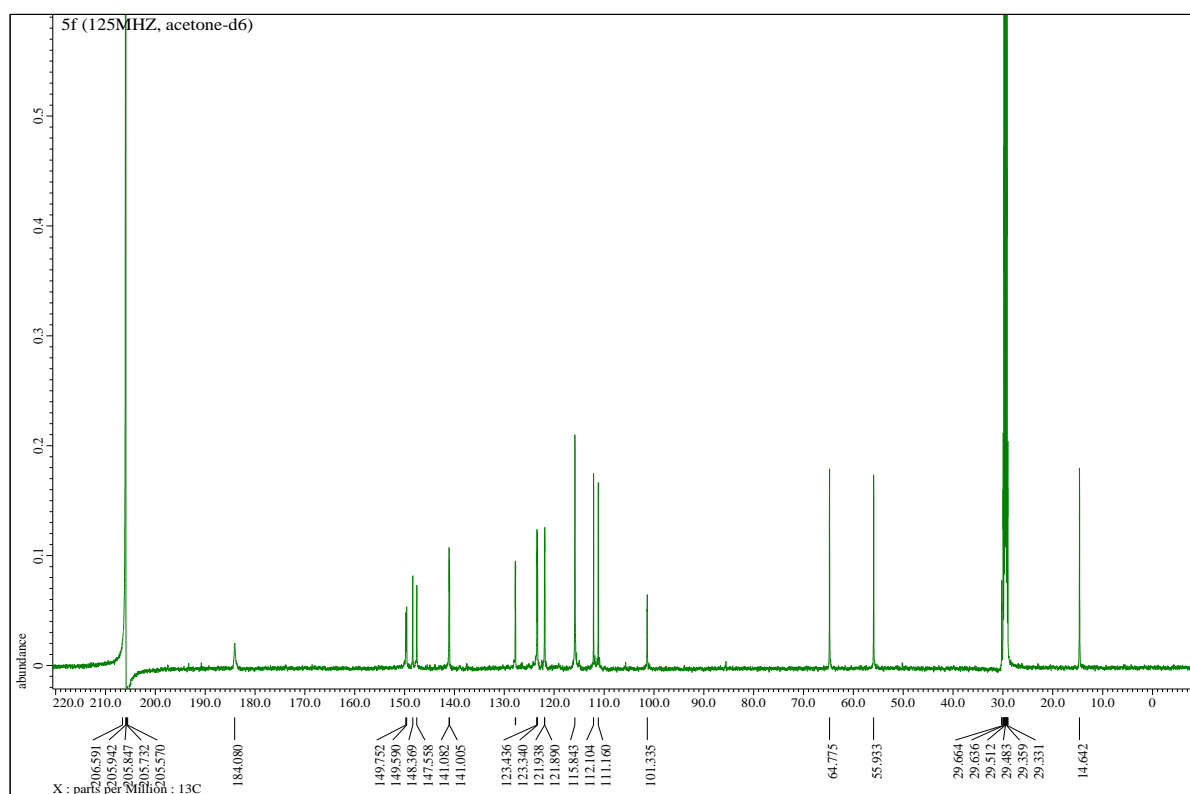

**Figure S11.**  $^1\text{H}$  (top) and  $^{13}\text{C}$  NMR (bottom) spectra in acetone- $d_6$  of **5f**

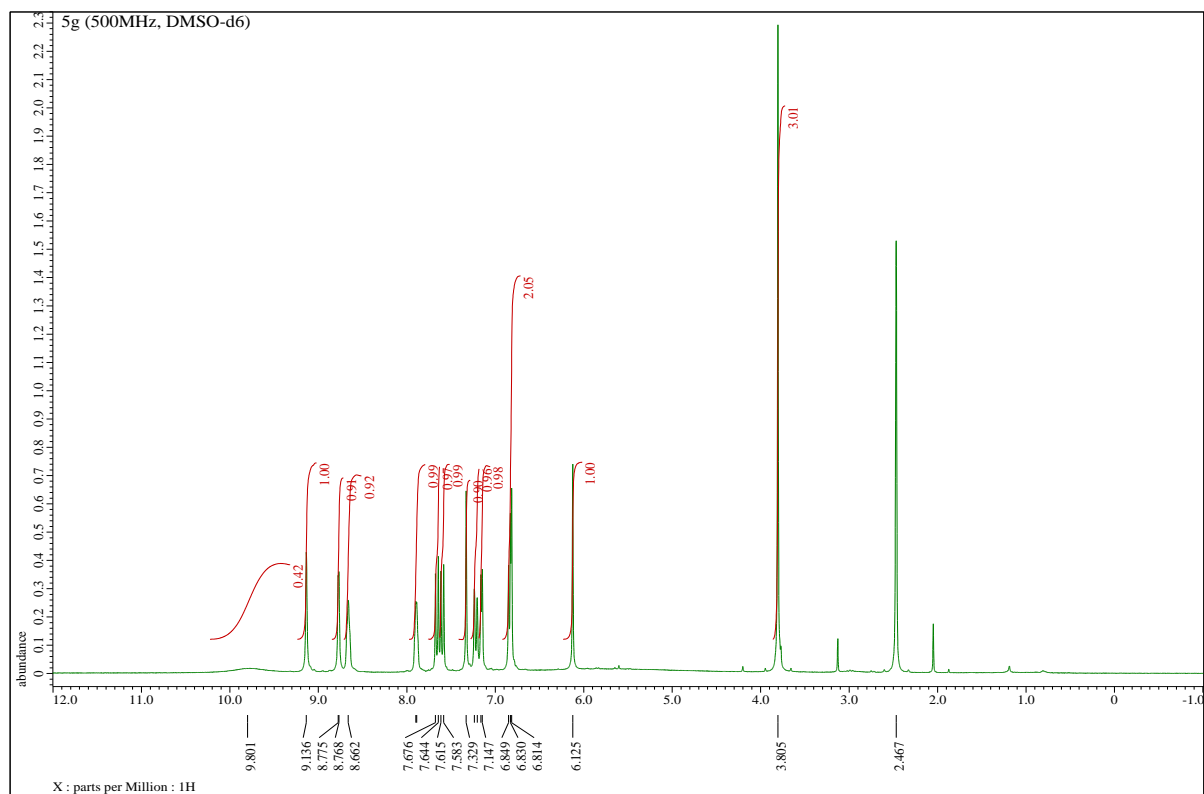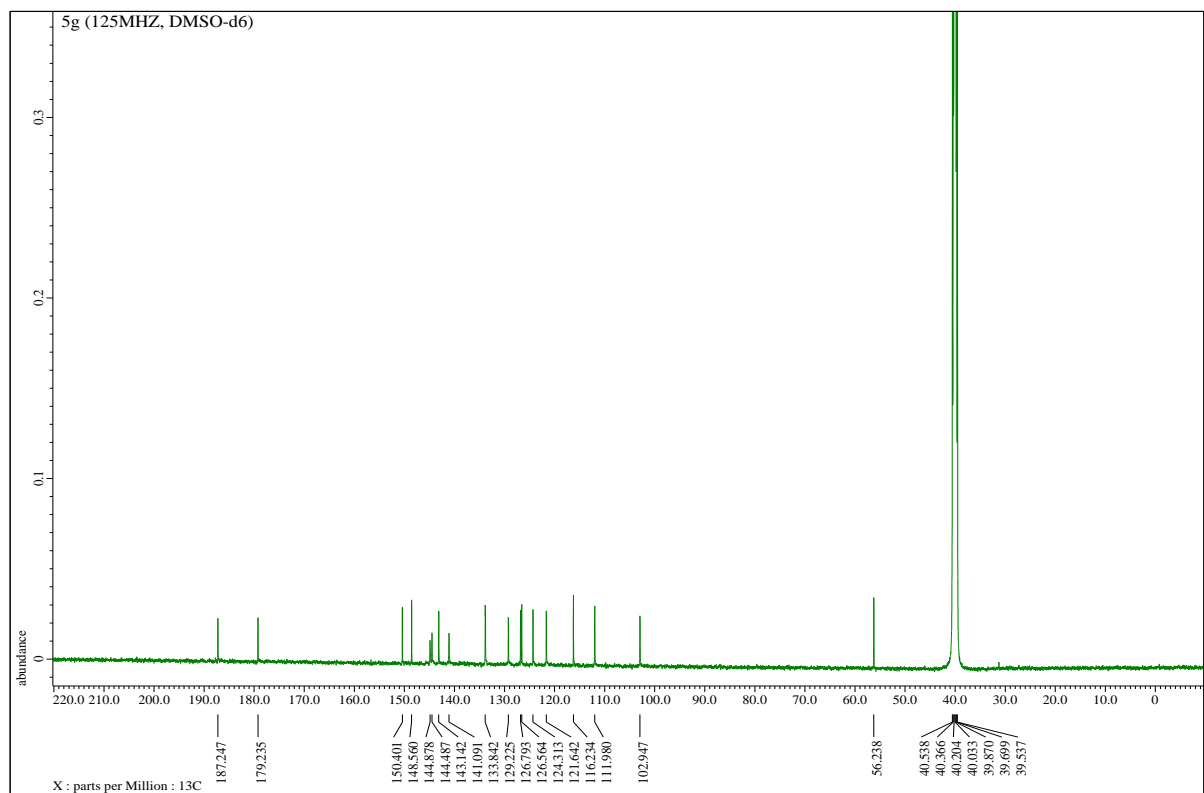

**Figure S12.**  $^1\text{H}$  (top) and  $^{13}\text{C}$  NMR (bottom) spectra in dimethylsulfoxide- $d_6$  of **5g**

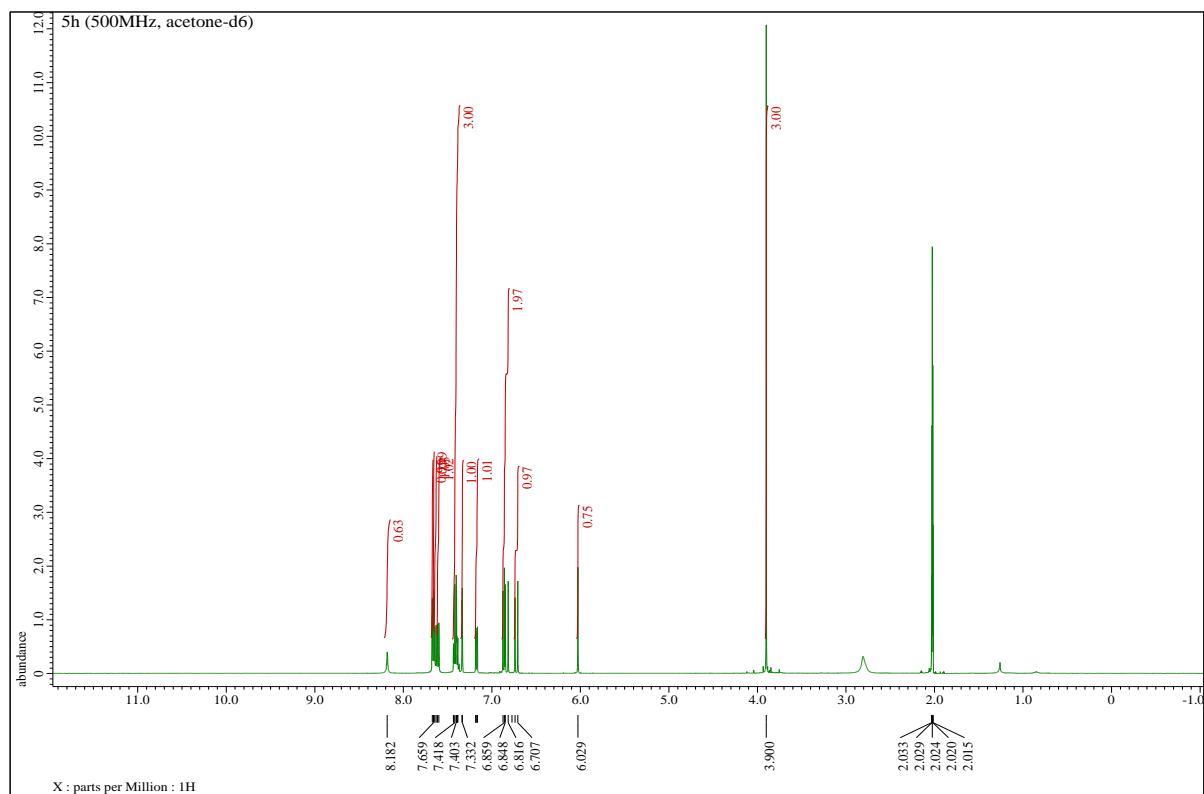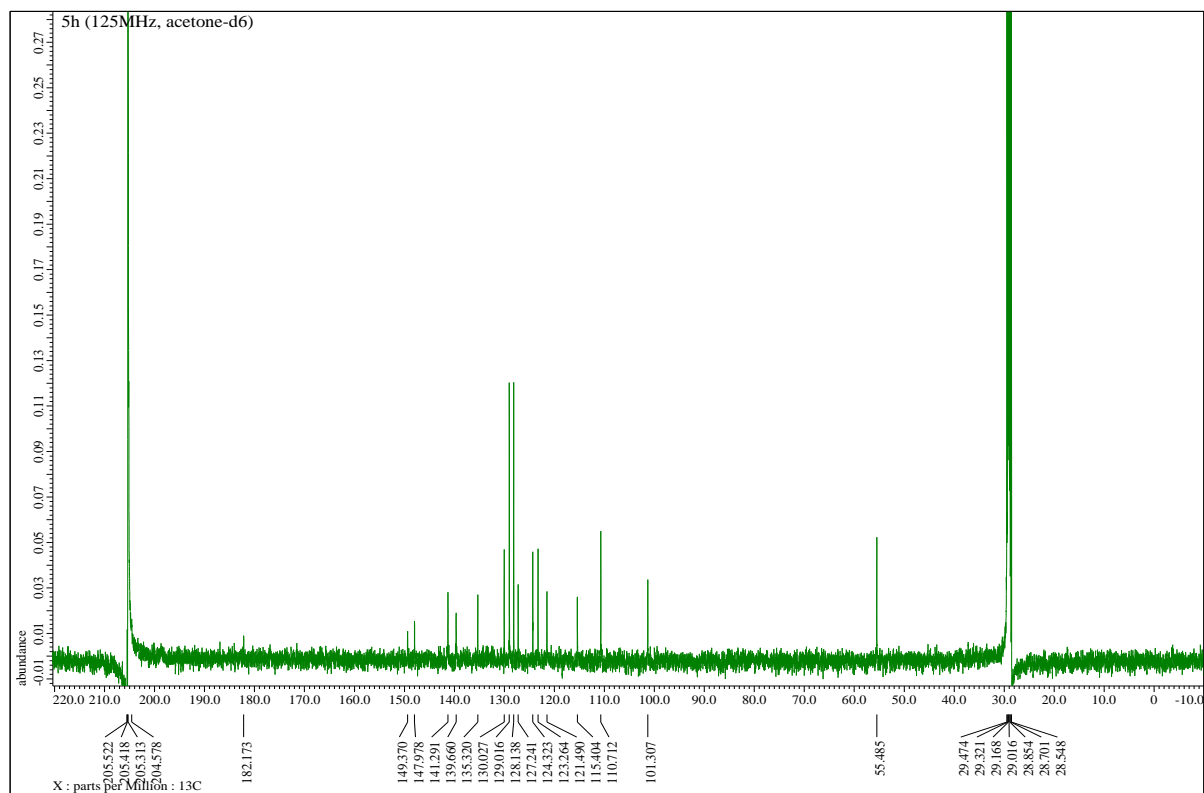

**Figure S13.**  $^1\text{H}$  (top) and  $^{13}\text{C}$  NMR (bottom) spectra in acetone- $d_6$  of **5h**





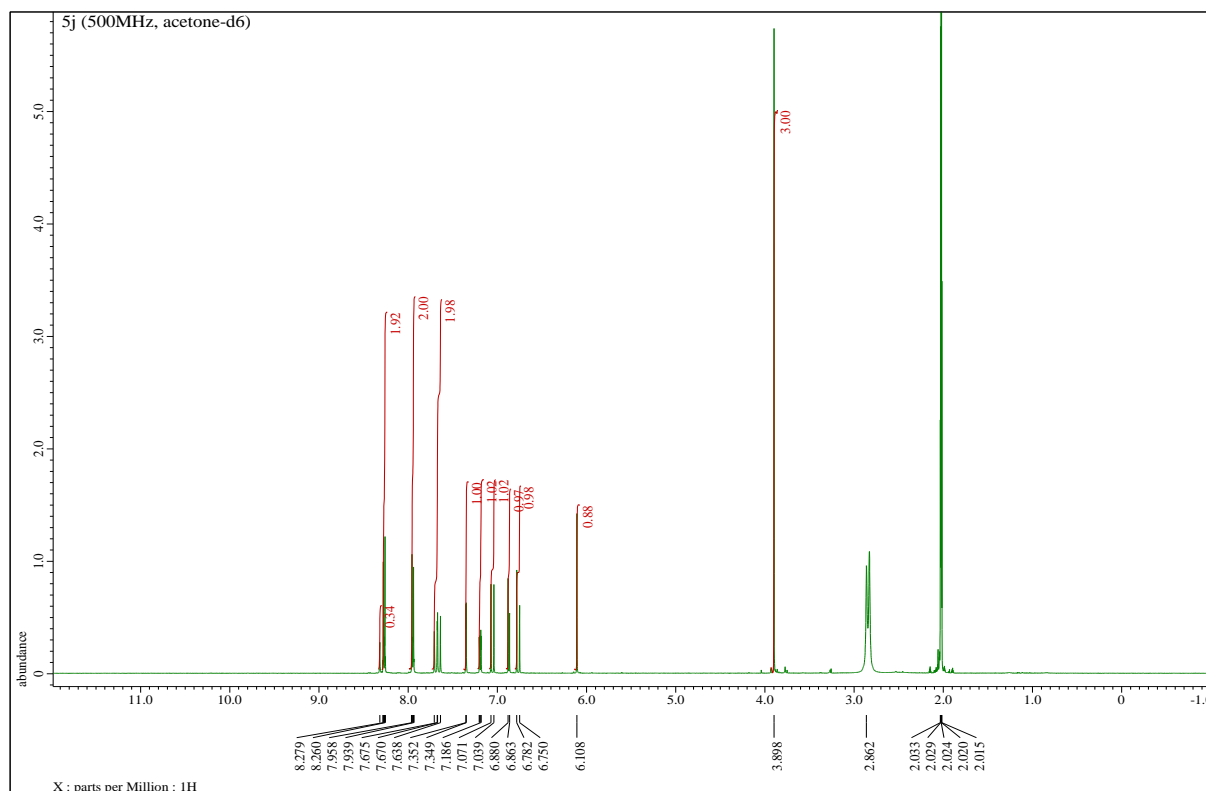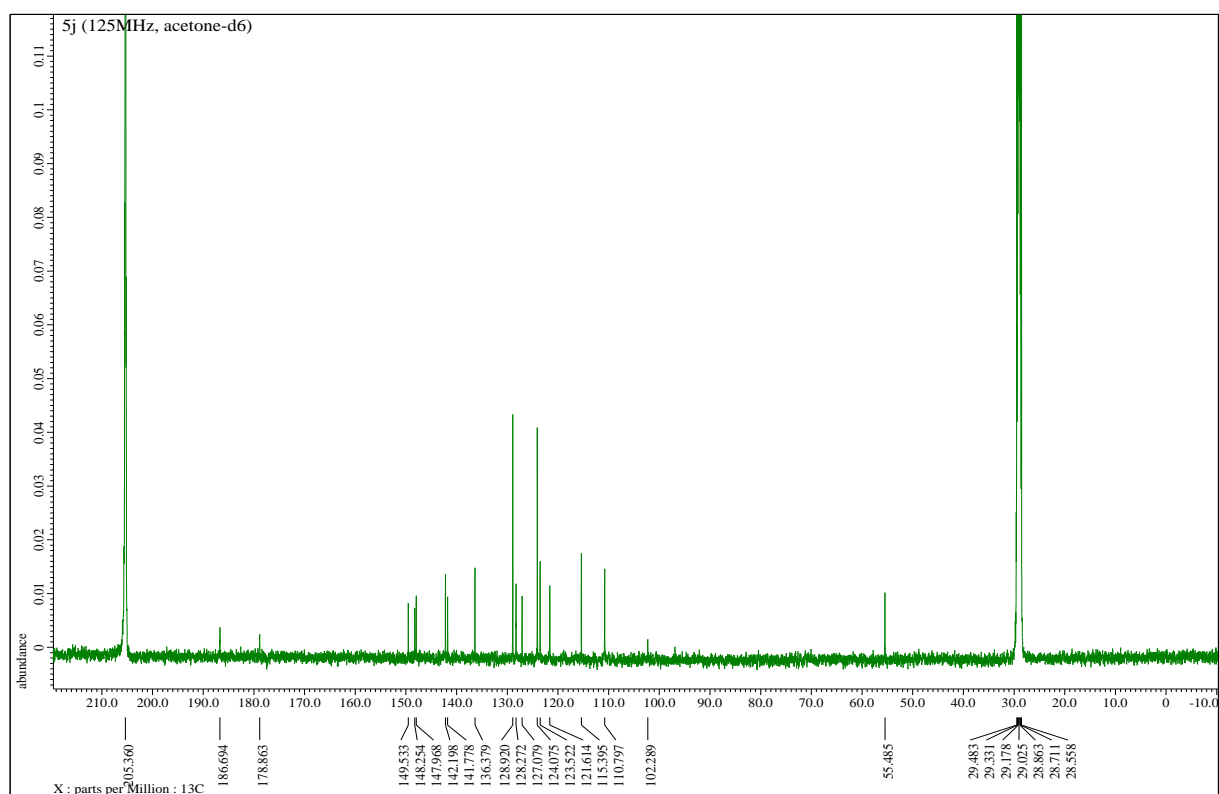

**Figure S15.**  $^1\text{H}$  (top) and  $^{13}\text{C}$  NMR (bottom) spectra in acetone- $d_6$  of **5j**

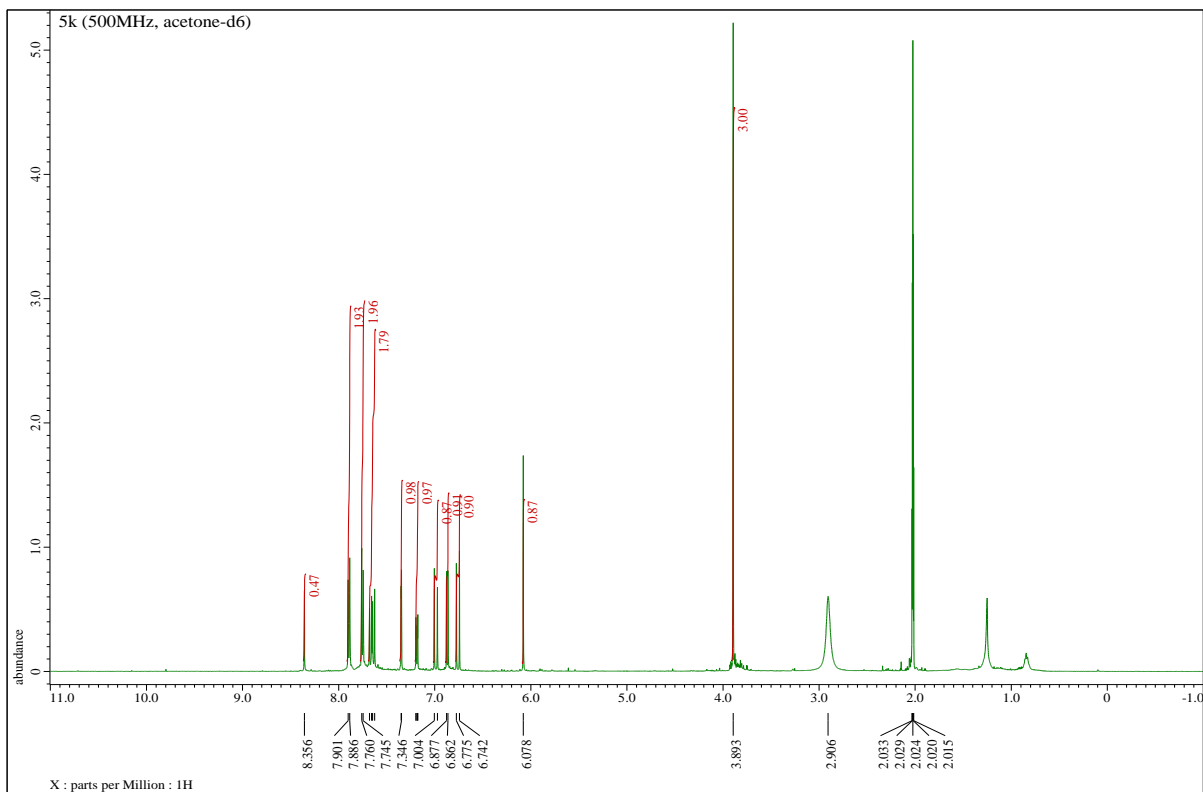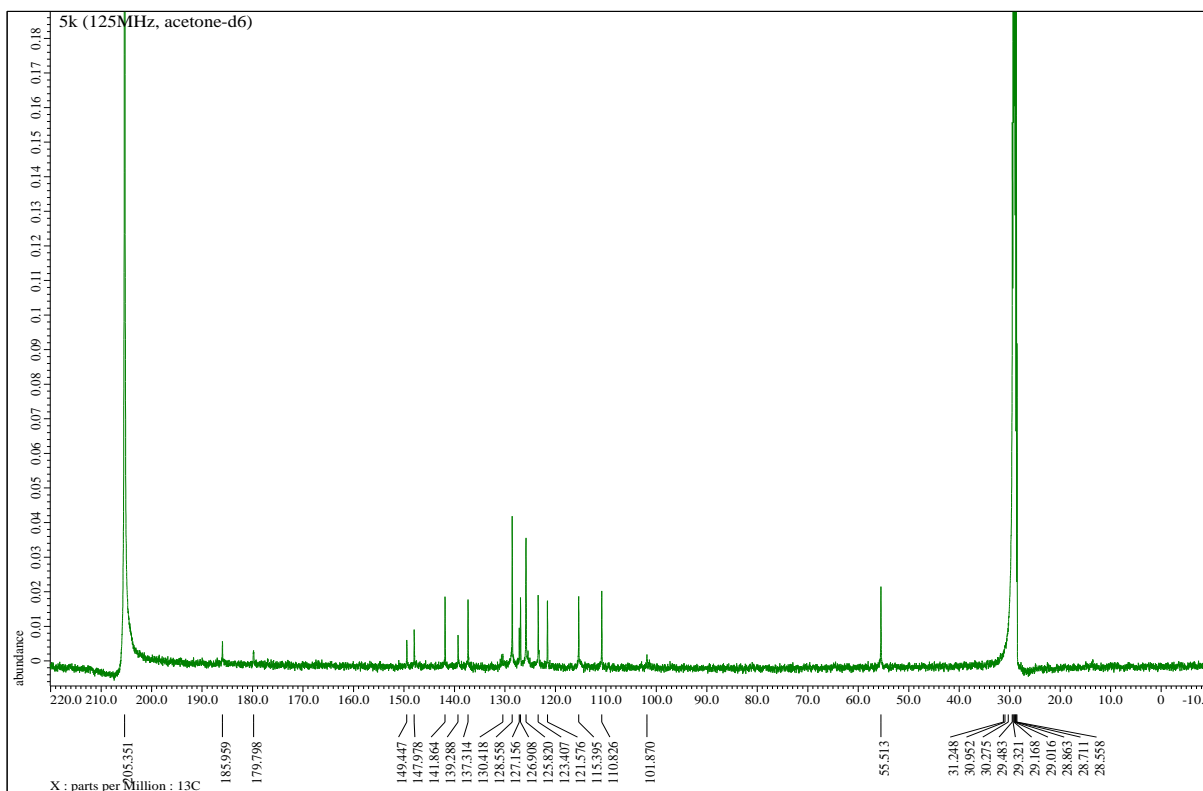

**Figure S16.**  $^1\text{H}$  (top) and  $^{13}\text{C}$  NMR (bottom) spectra in acetone- $d_6$  of **5k**

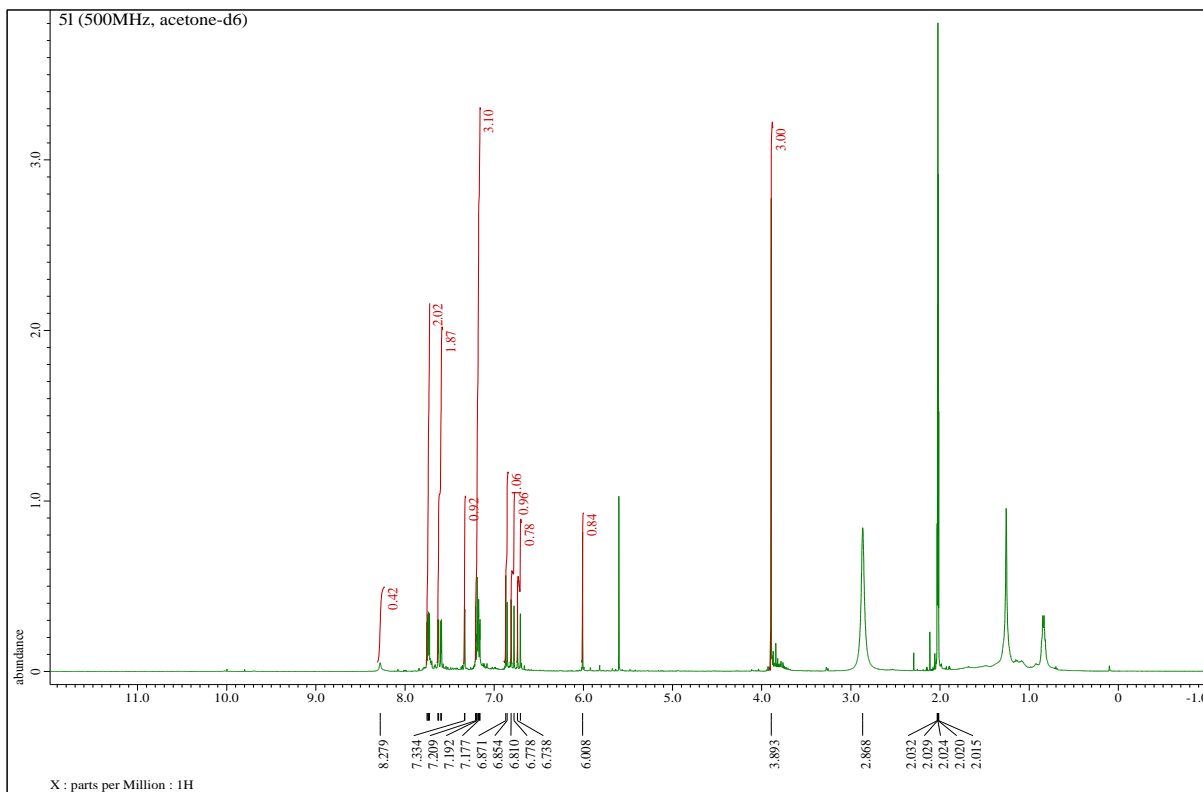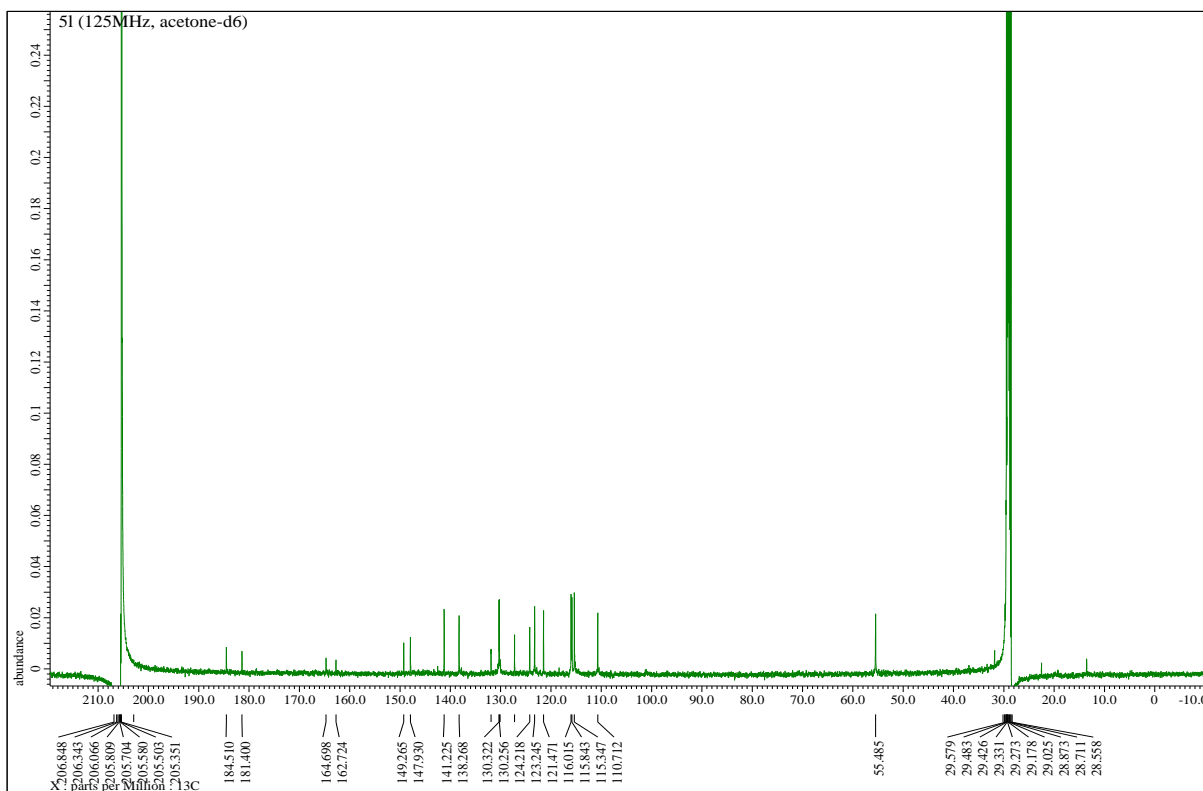

**Figure S17.**  $^1\text{H}$  (top) and  $^{13}\text{C}$  NMR (bottom) spectra in acetone- $d_6$  of **51**

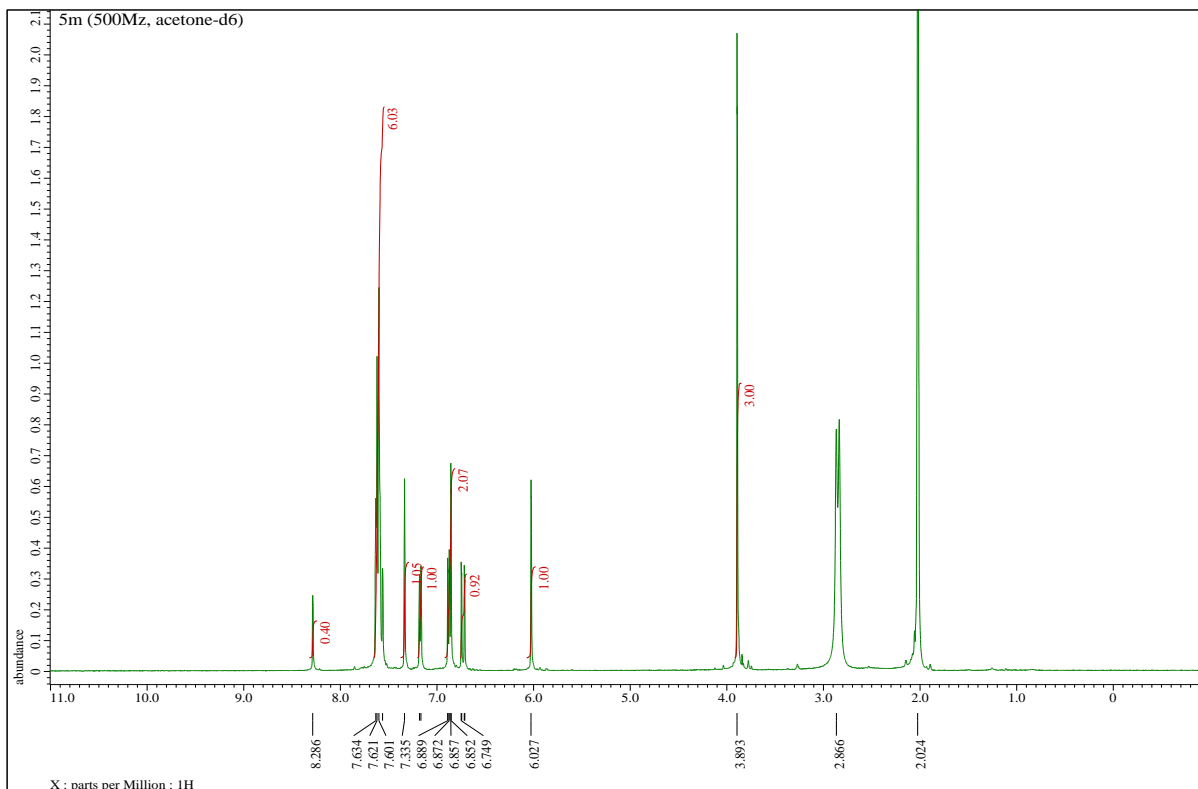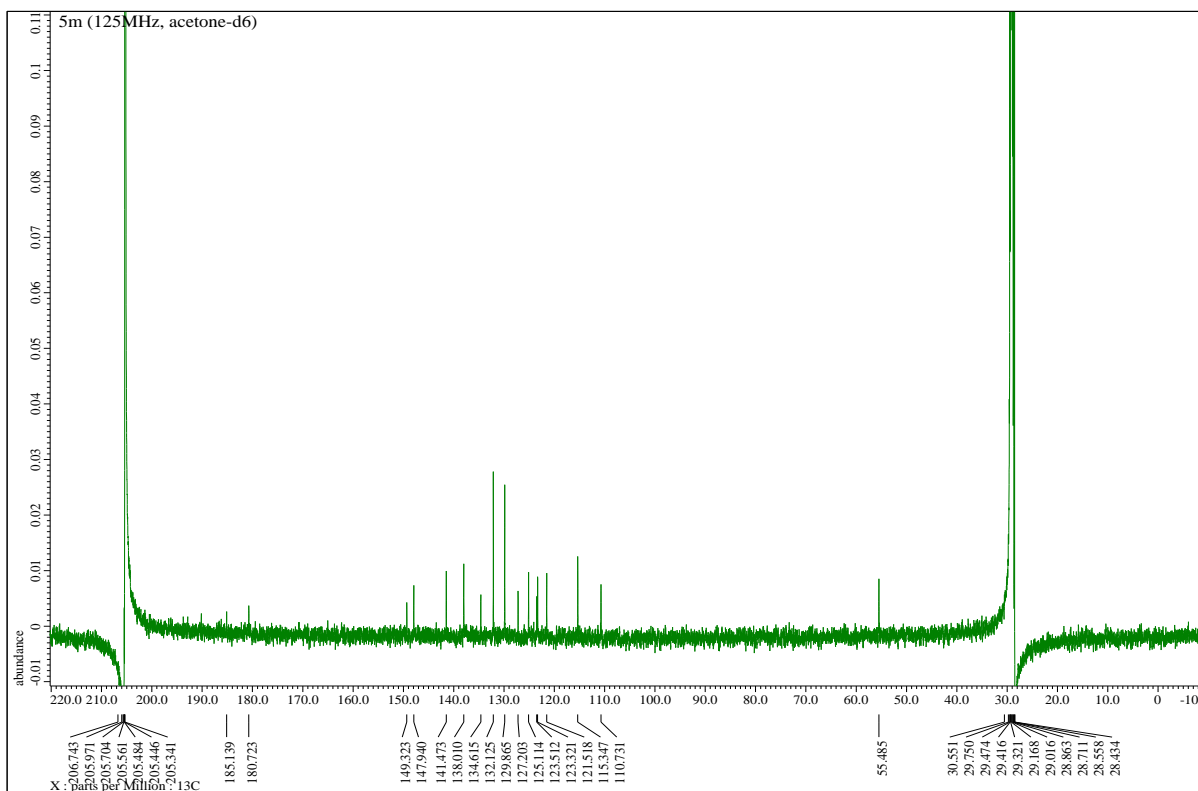

**Figure S18.**  $^1\text{H}$  (top) and  $^{13}\text{C}$  NMR (bottom) spectra in acetone- $d_6$  of **5m**

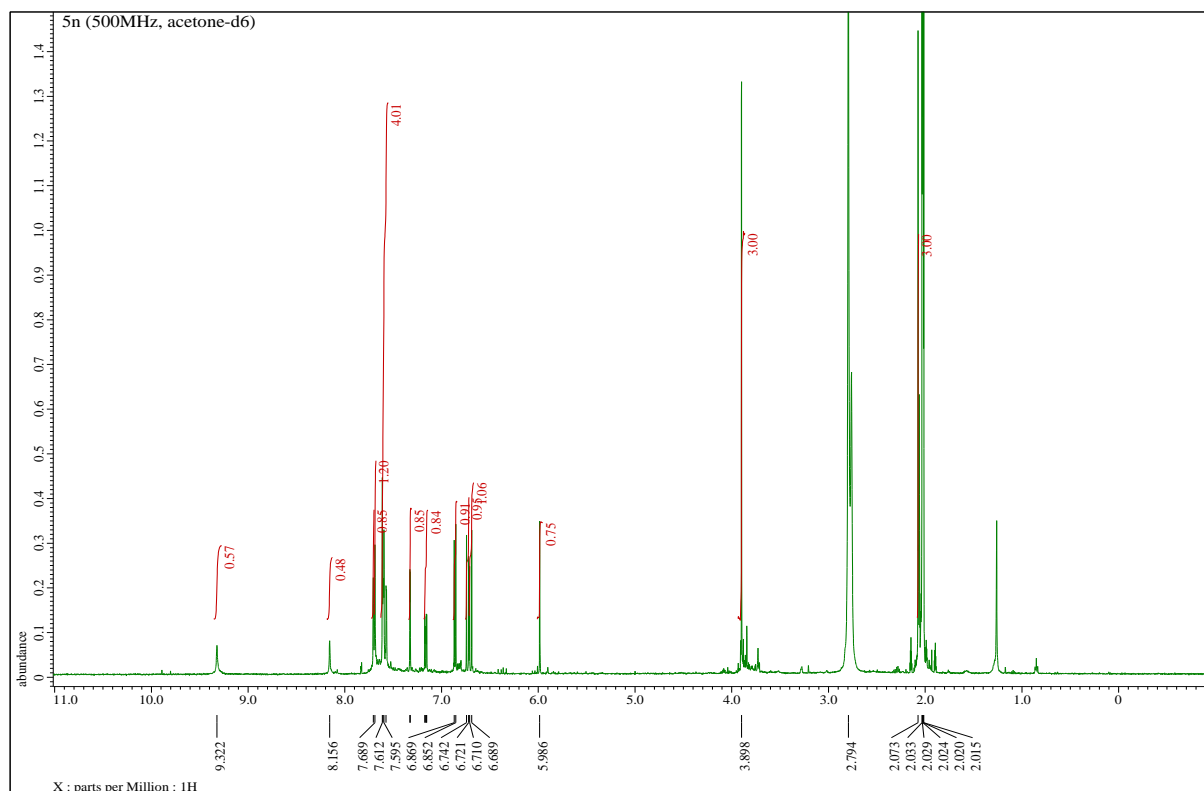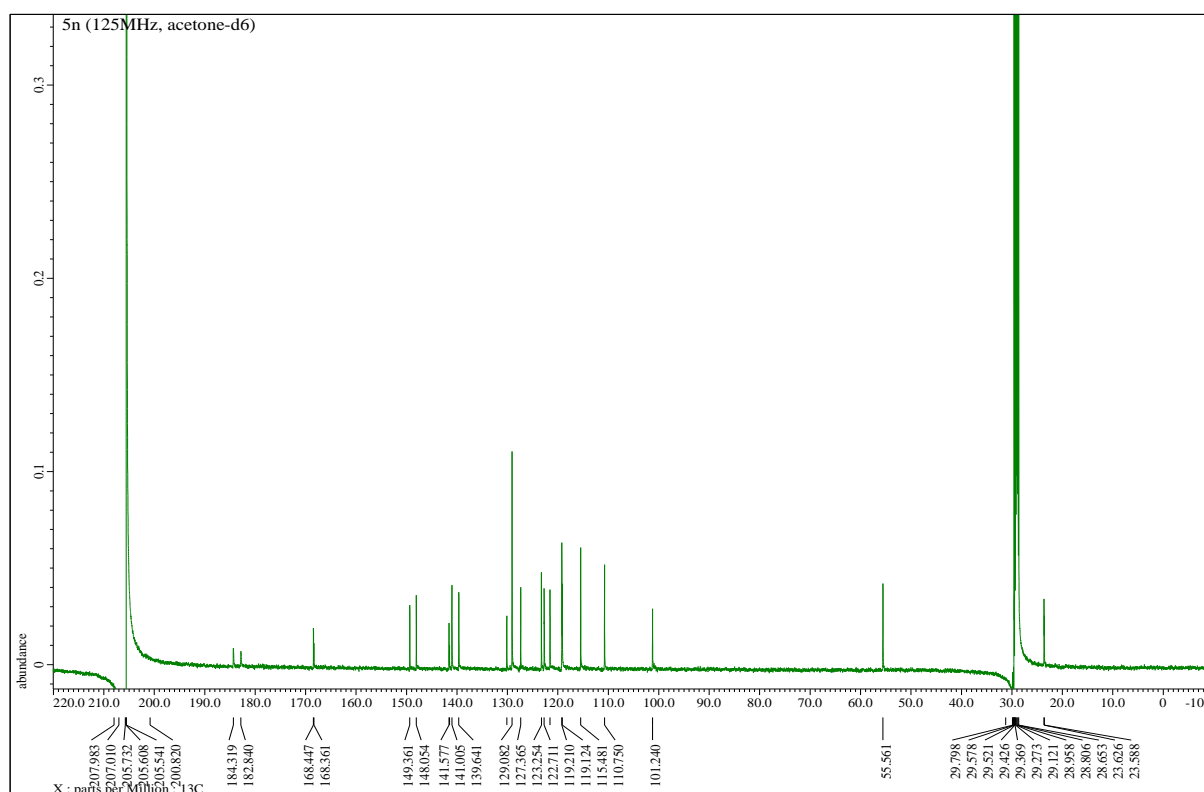

**Figure S19.** <sup>1</sup>H (top) and <sup>13</sup>C NMR (bottom) spectra in acetone-*d*<sub>6</sub> of **5n**

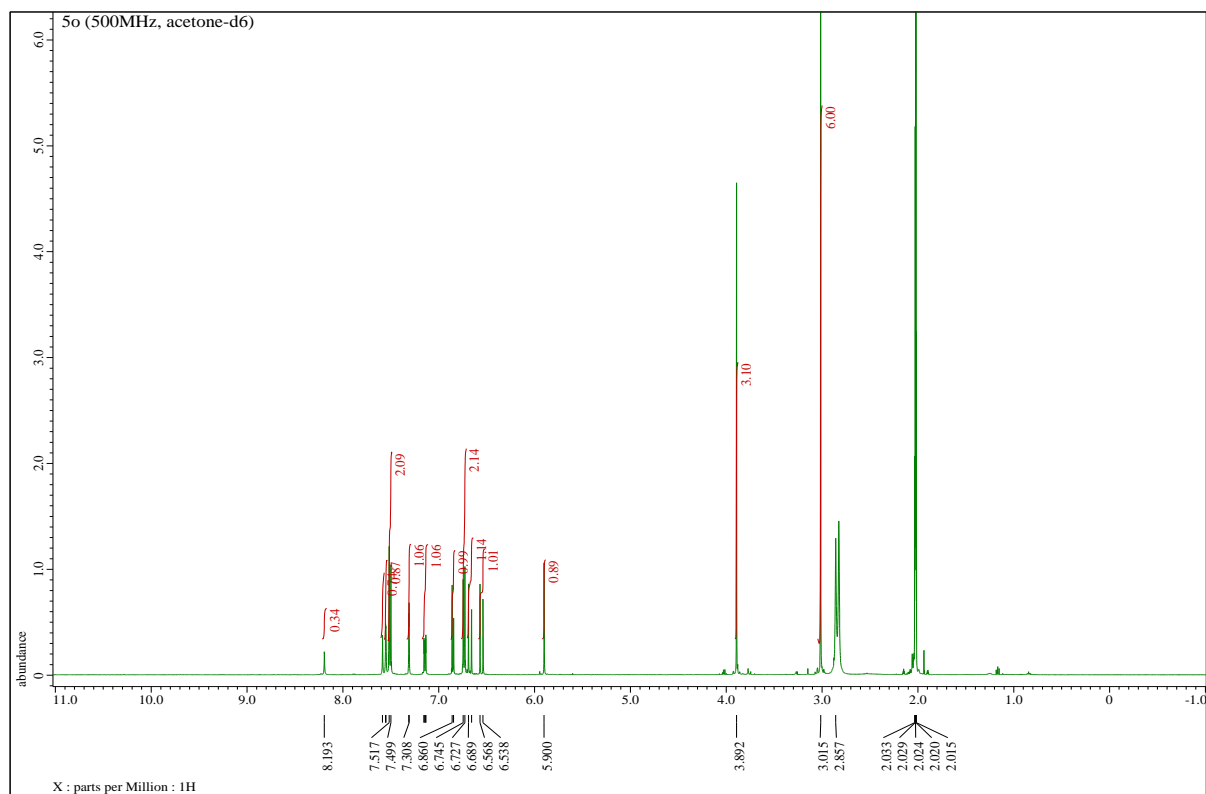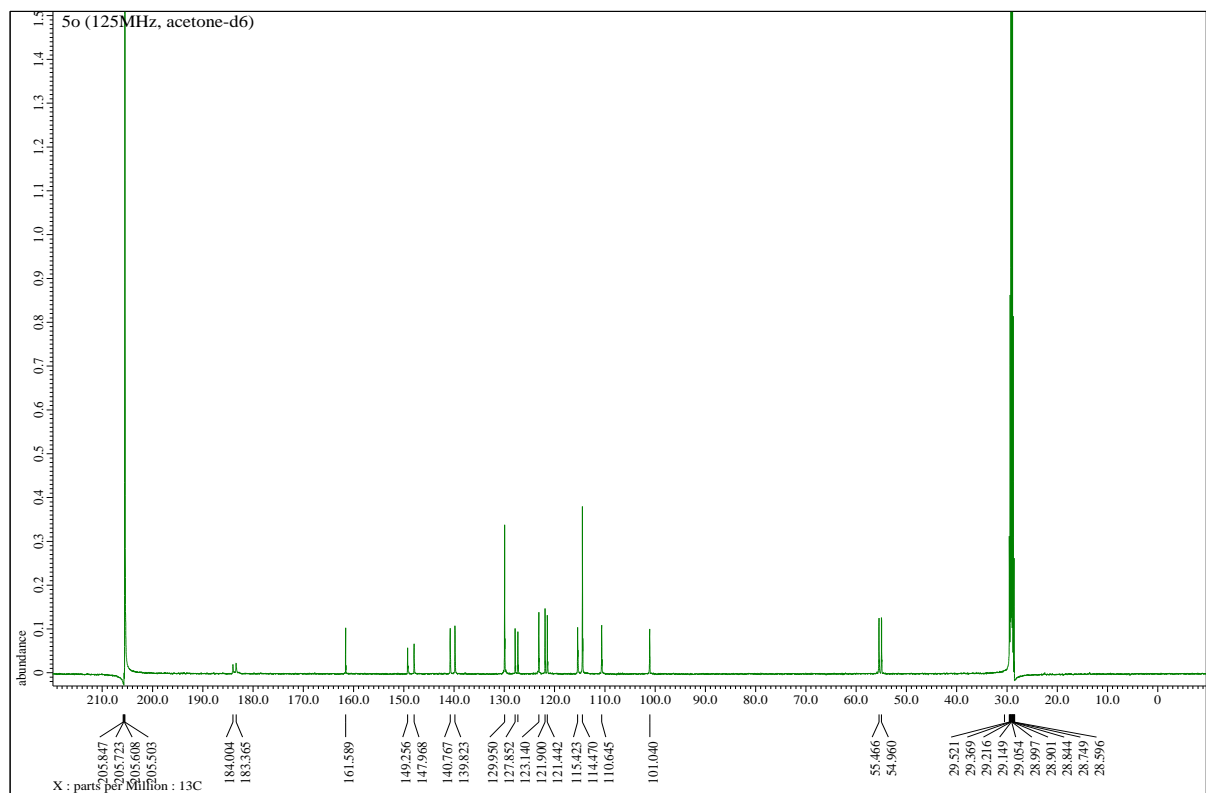

**Figure S20.**  $^1\text{H}$  (top) and  $^{13}\text{C}$  NMR (bottom) spectra in acetone- $d_6$  of **5o**

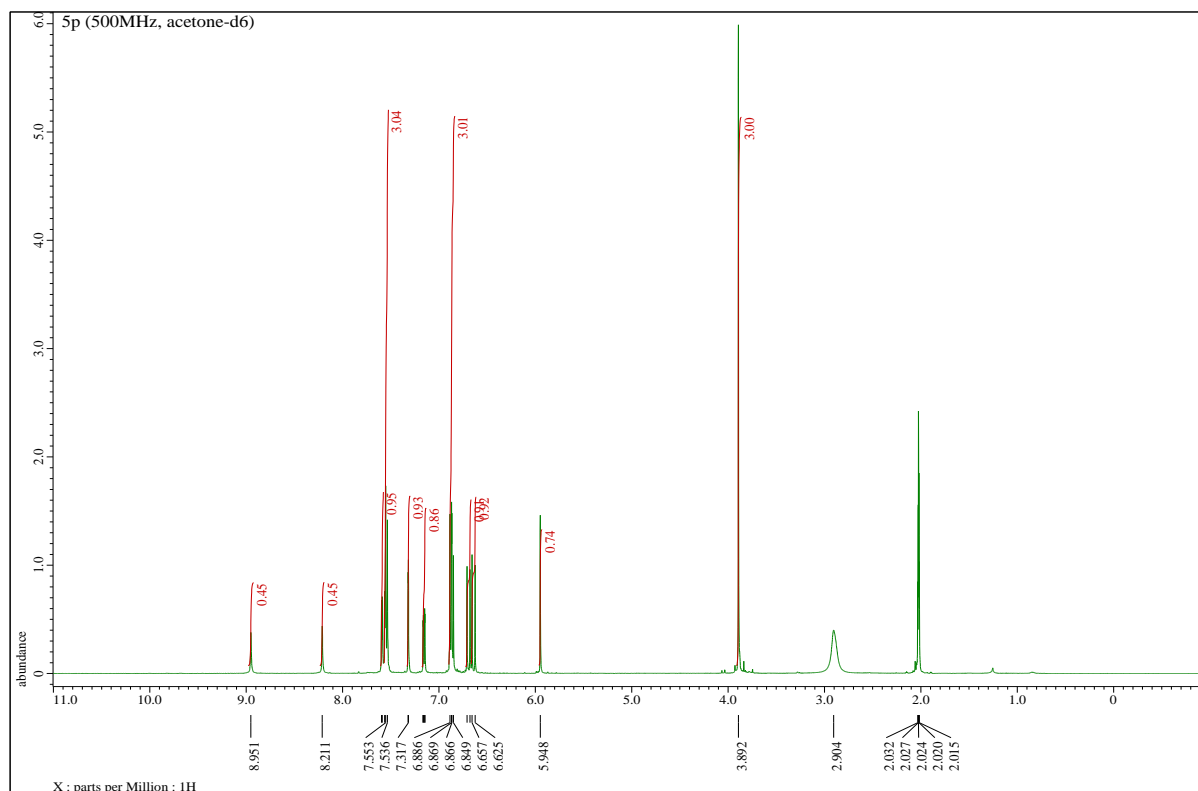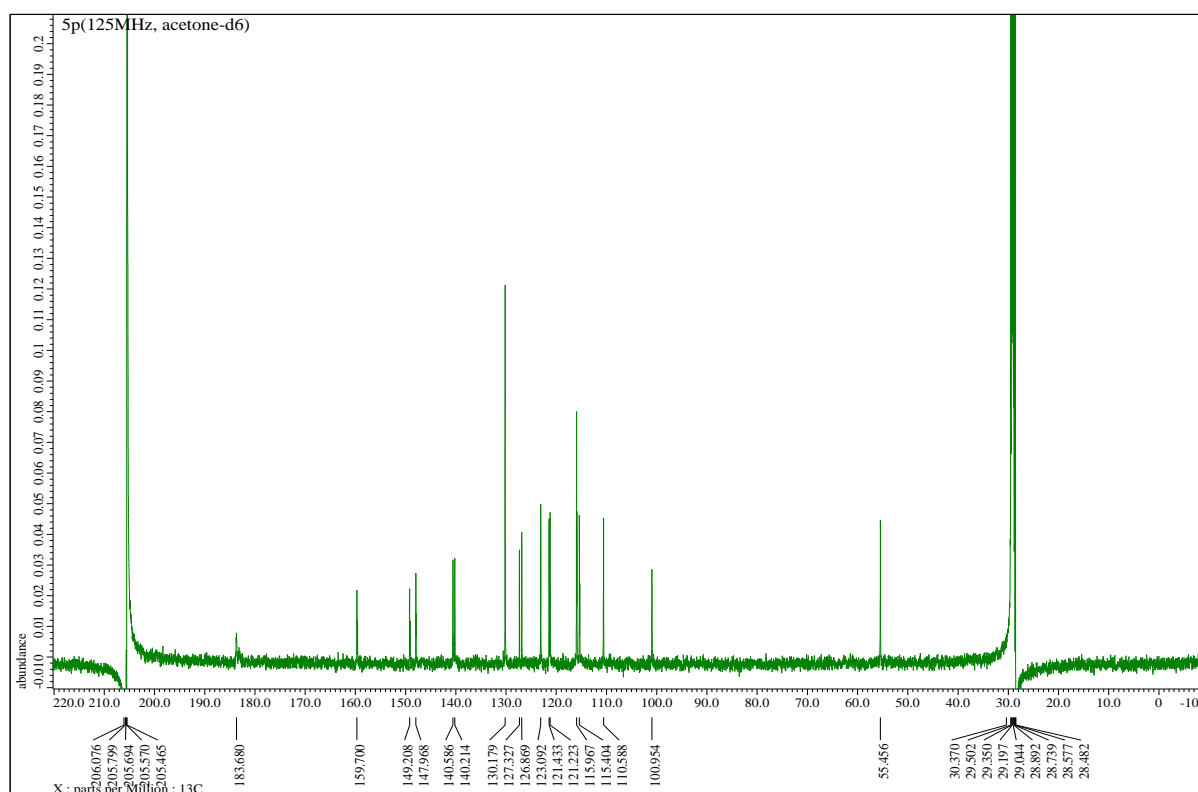

**Figure S21.**  $^1\text{H}$  (top) and  $^{13}\text{C}$  NMR (bottom) spectra in acetone- $d_6$  of **5p**

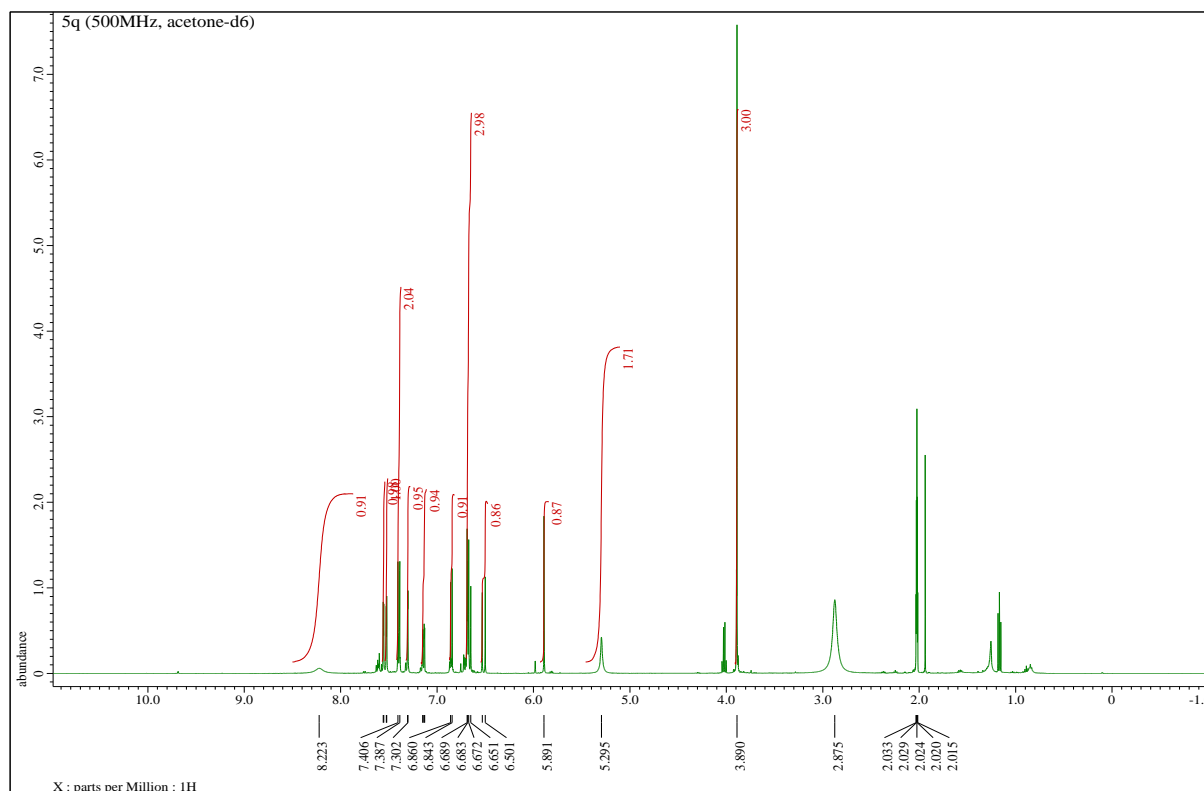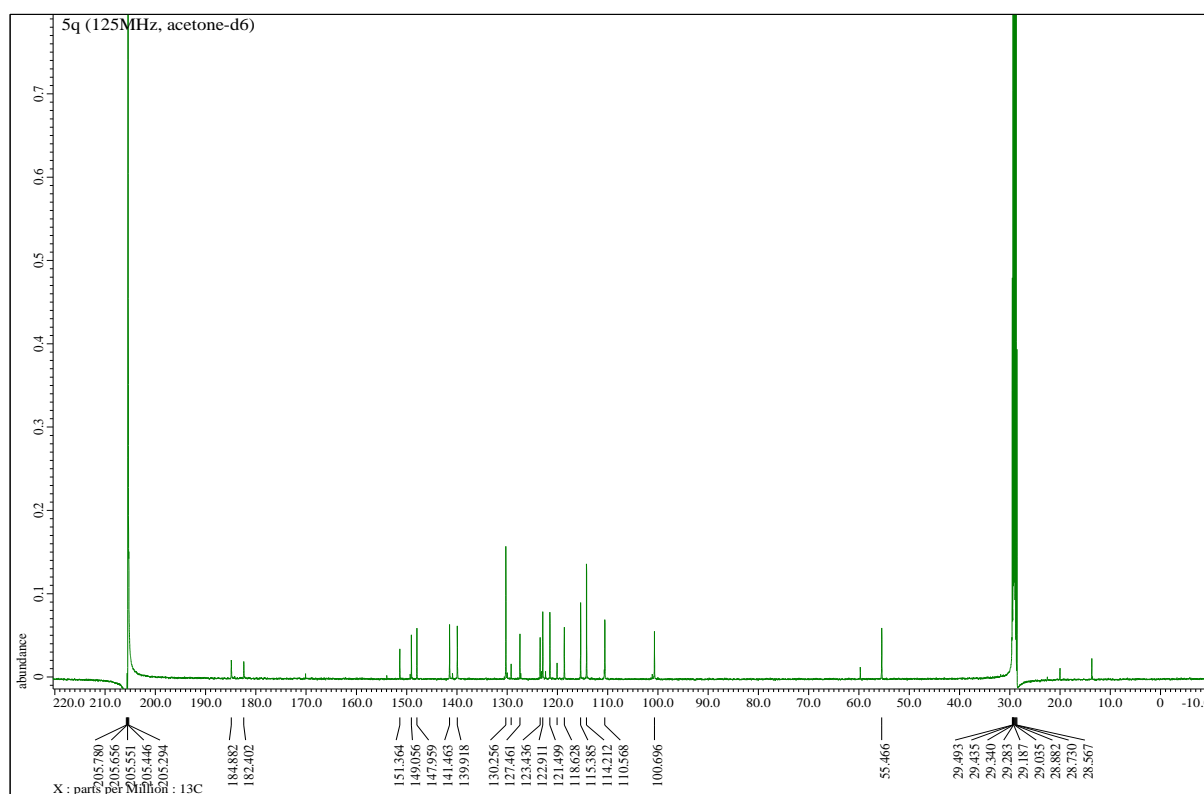

**Figure S22.**  $^1\text{H}$  (top) and  $^{13}\text{C}$  NMR (bottom) spectra in acetone- $d_6$  of **5q**



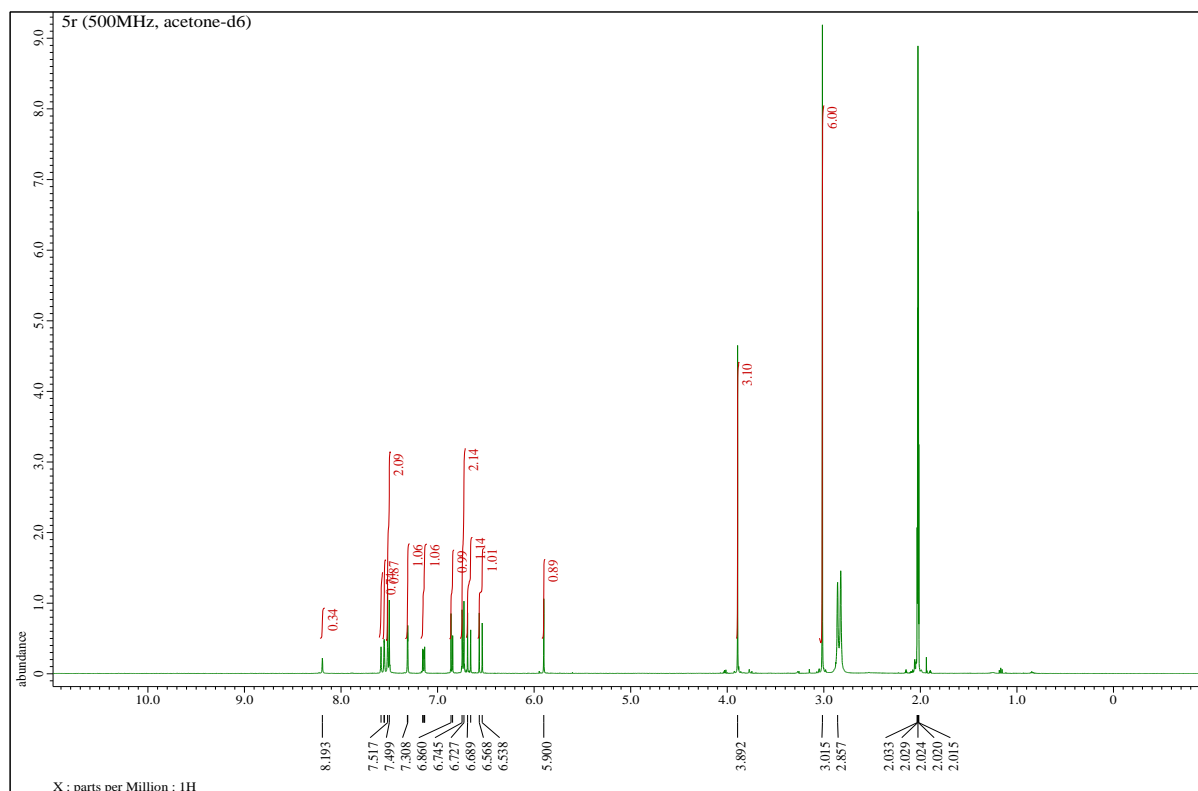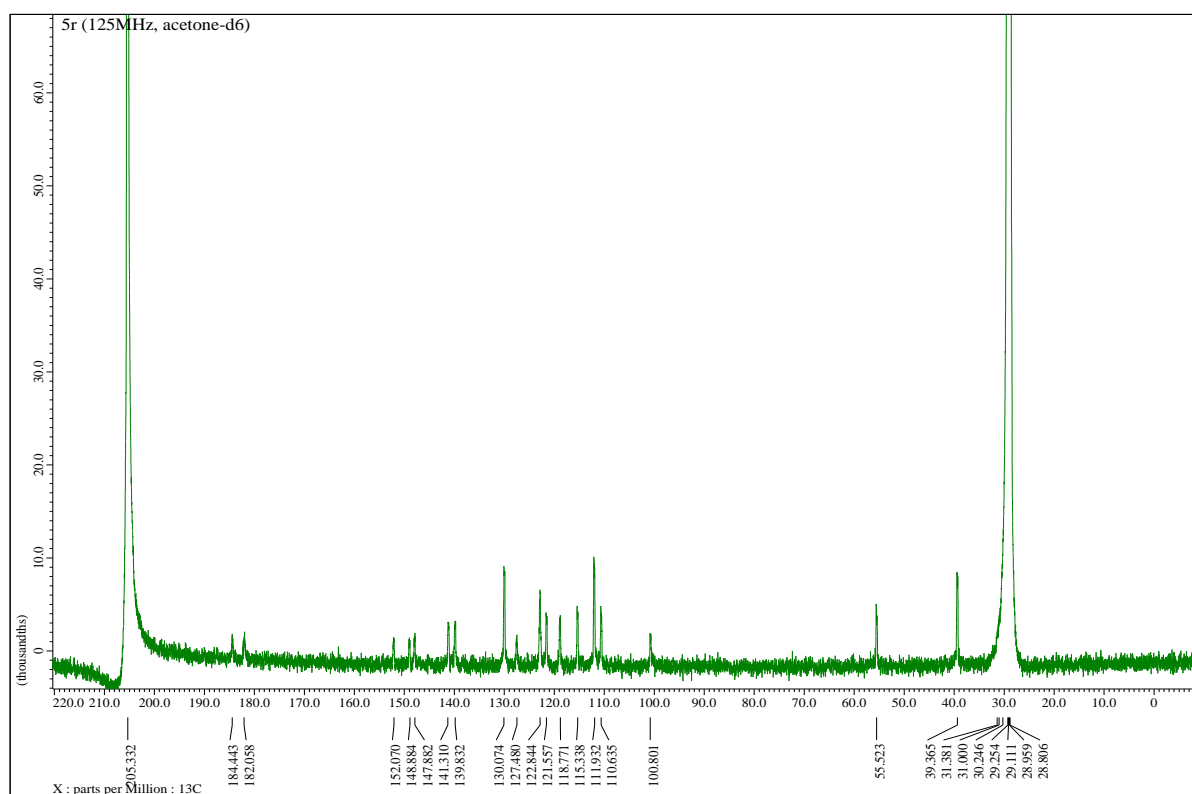

**Figure S23.**  $^1\text{H}$  (top) and  $^{13}\text{C}$  NMR (bottom) spectra in acetone- $d_6$  of **5r**

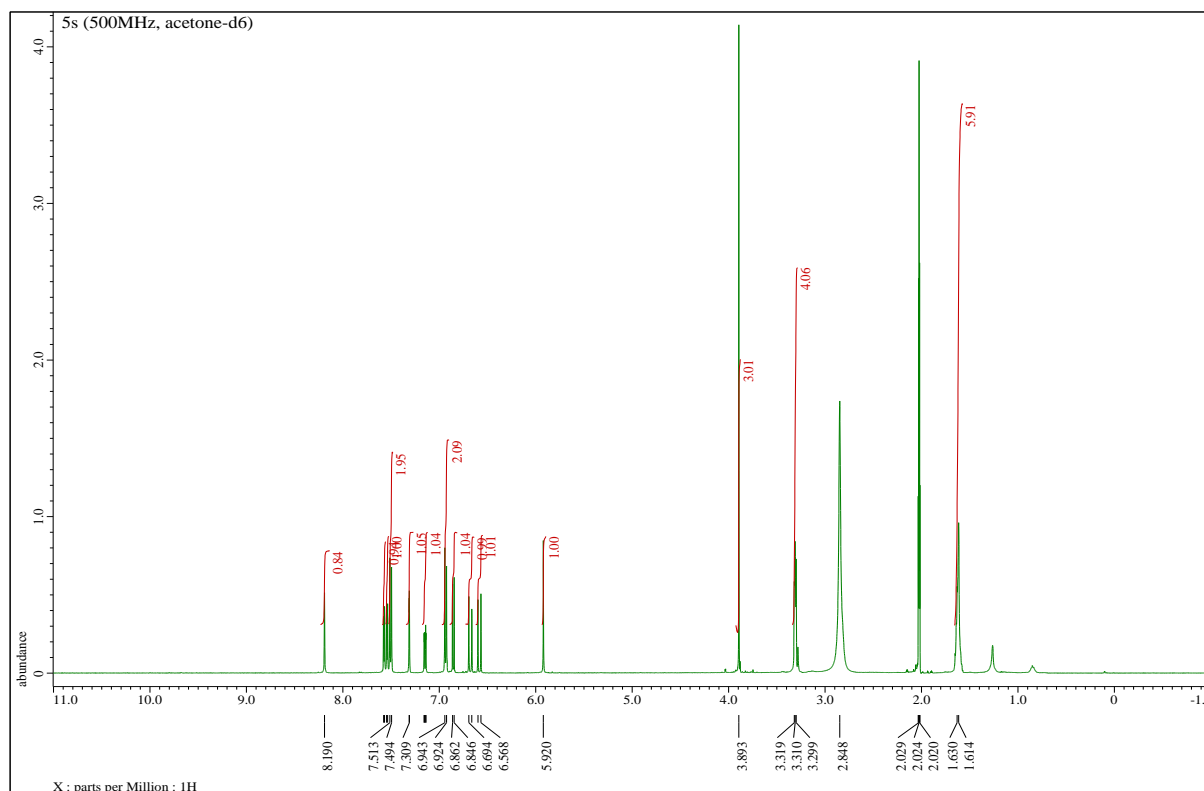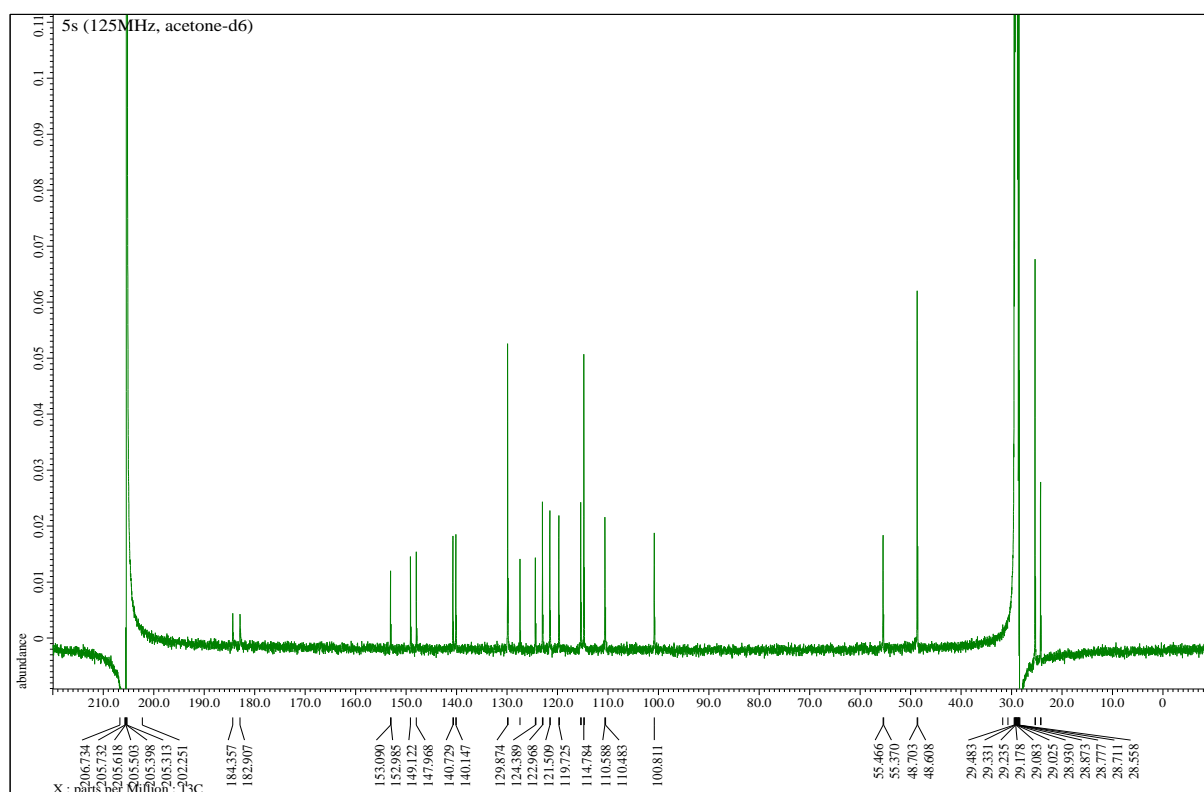

**Figure S24.**  $^1\text{H}$  (top) and  $^{13}\text{C}$  NMR (bottom) spectra in acetone- $d_6$  of **5s**

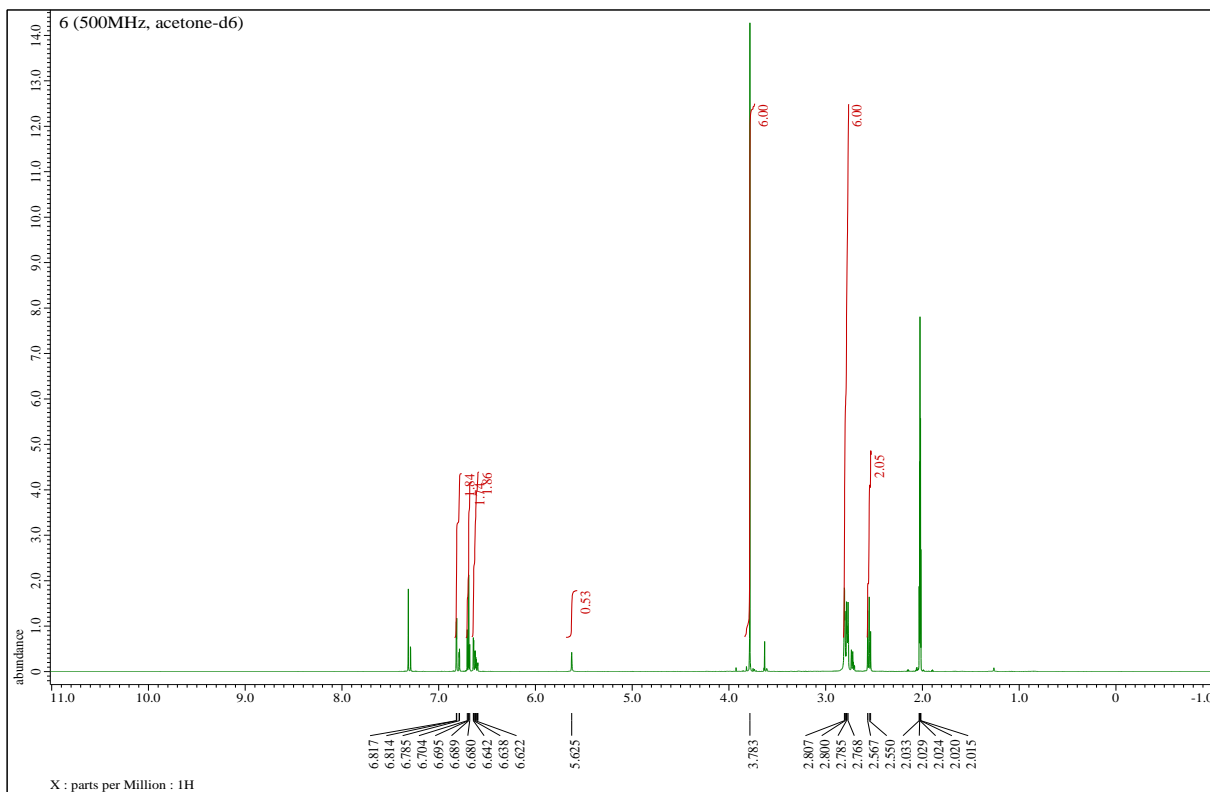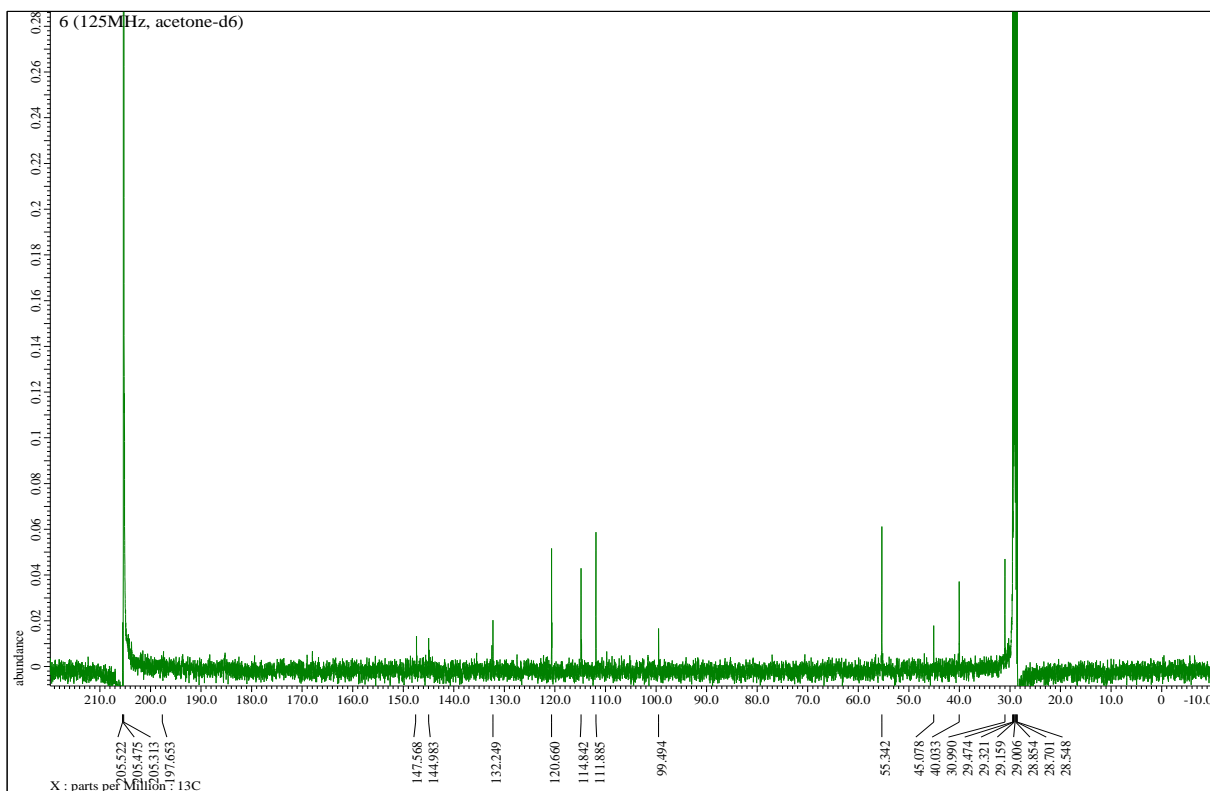

**Figure S25.** <sup>1</sup>H (top) and <sup>13</sup>C NMR (bottom) spectra in acetone-*d*<sub>6</sub> of **6**

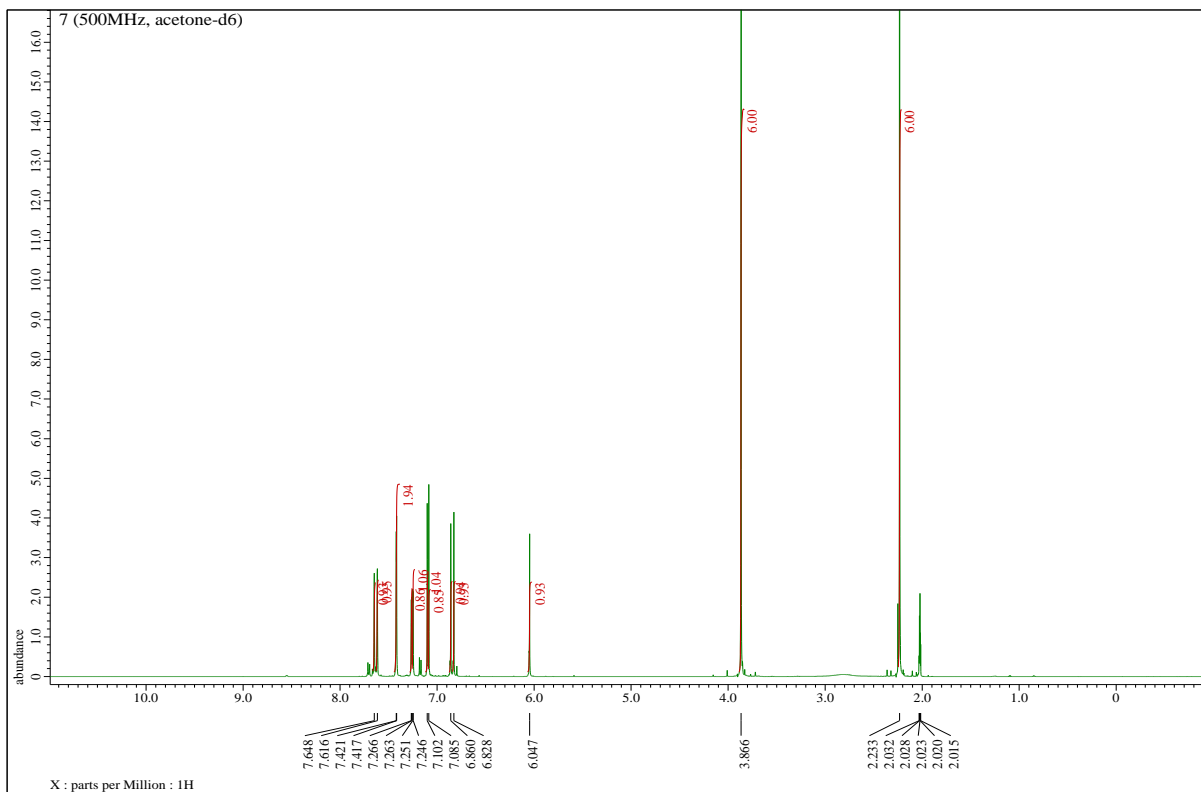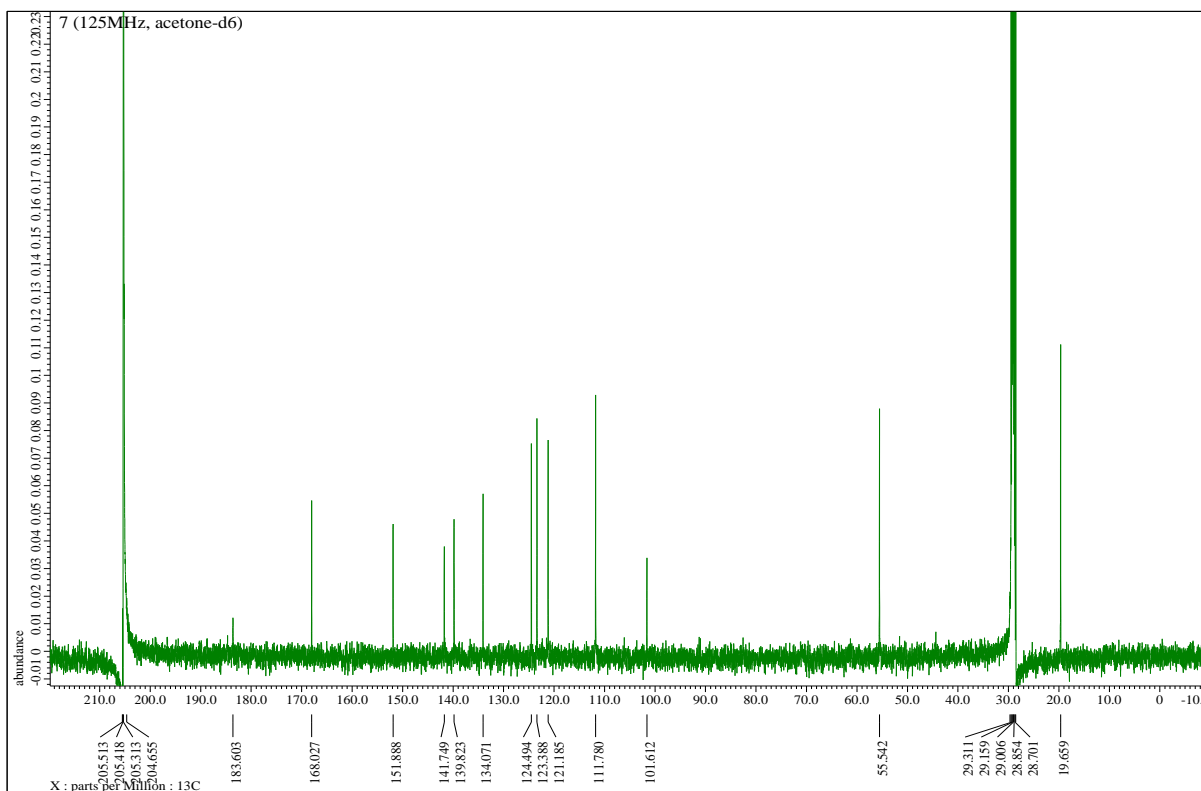

Figure S26. <sup>1</sup>H (top) and <sup>13</sup>C NMR (bottom) spectra in acetone-*d*<sub>6</sub> of **7**

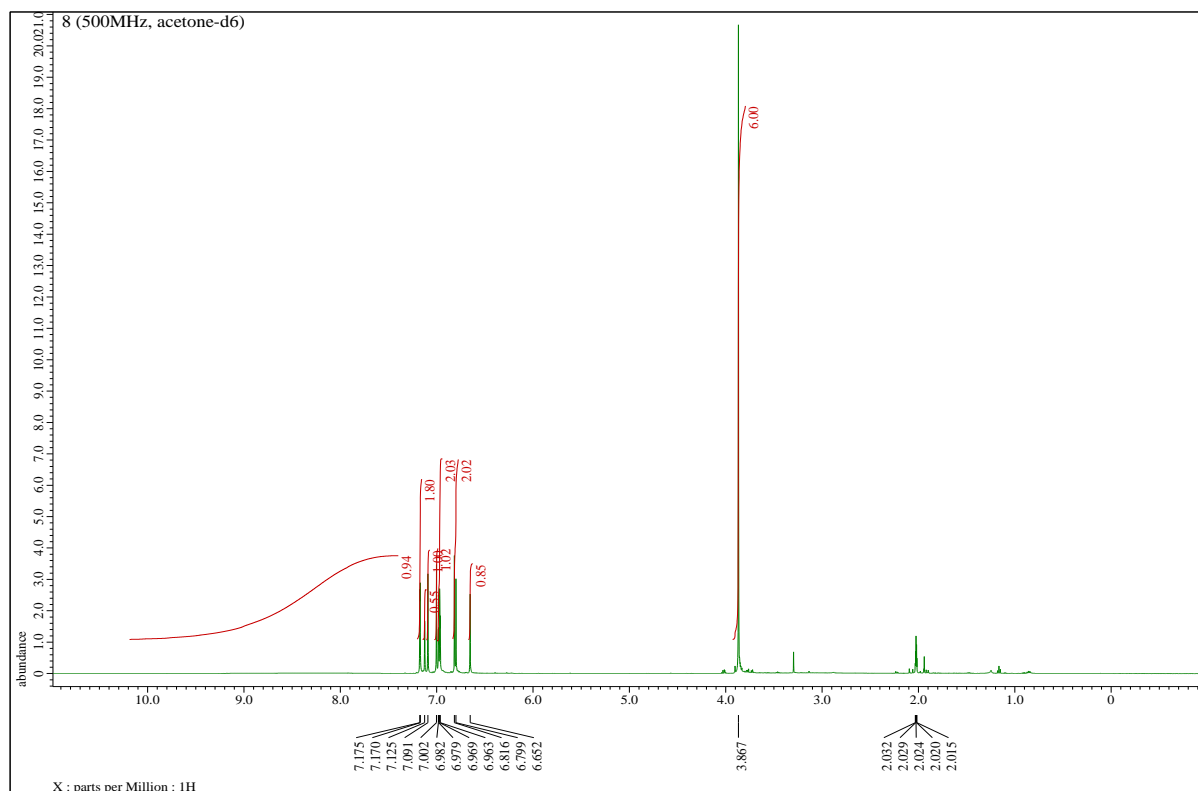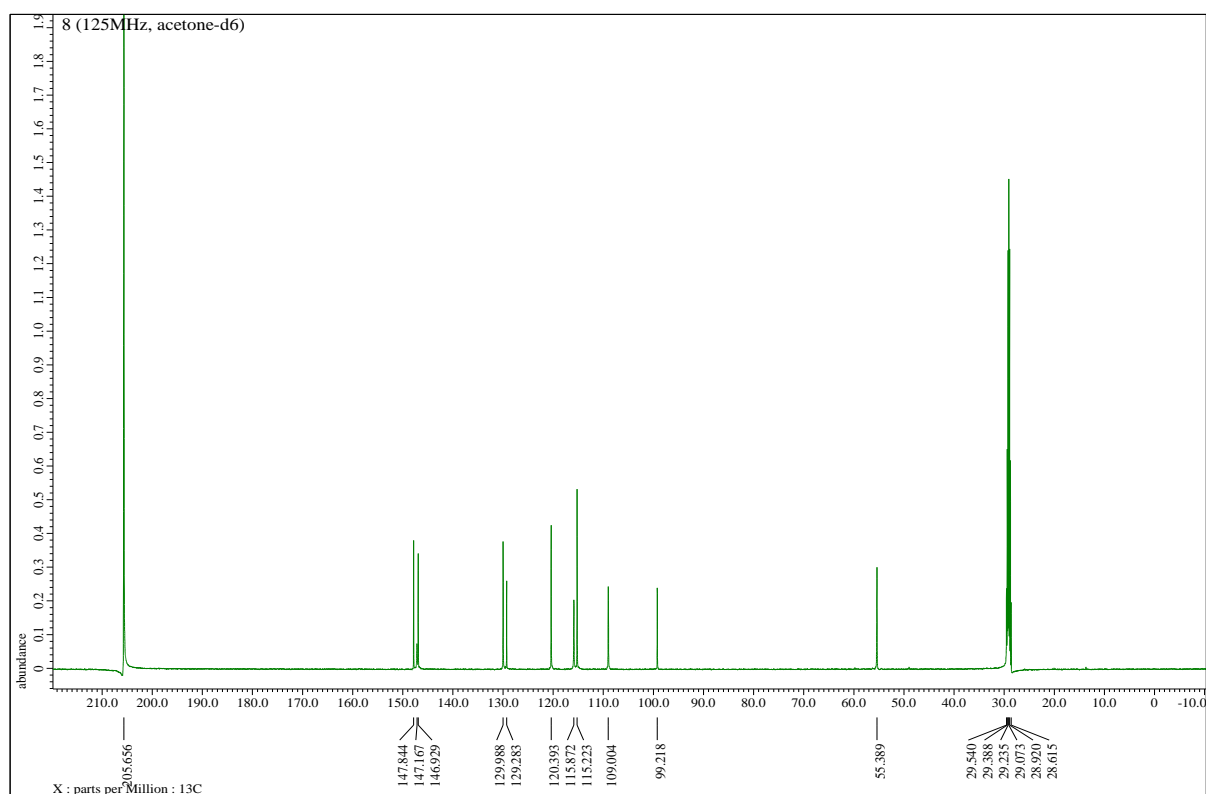

**Figure S27.** <sup>1</sup>H (top) and <sup>13</sup>C NMR (bottom) spectra in acetone-*d*<sub>6</sub> of **8**

## 2. Preparation of enzyme

1 gaaggagcggctttaacagagaaaacggacatattcgaaagcgggcgtaacggtaacca  
E G A A L T E K T D I F E S G R N G K P  
61 aataaagatggaatcaagagttatcgtattccagcacttctcaagacagataaaggaact  
N K D G I K S Y R I P A L L K T D K G T  
121 ttgatcgcagggtgcagatgaacgccgtctccattcgagtgactggggtgatatcggtatg  
L I A G A D E R R L H S S D W G D I G M  
181 gtcattcagacgtagtgagataatggtaaaacttggggtgaccgagtaaccattaccaac  
V I R R S E D N G K T W G D R V T I T N  
241 ttacgtgacaatccaaaagcttctgacccatcgatcggttcaccagtgaaatcgatag  
L R D N P K A S D P S I G S P V N I D M  
301 gtgttgggtcaagatcctgaaaccaaacgaatcttttctatctatgacatgttcccagaa  
V L V Q D P E T K R I F S I Y D M F P E  
361 gggagggaatctttggaatgtcttcacaaaaagaagaagcctacaaaaaatcgatgga  
G K G I F G M S S Q K E E A Y K K I D G  
421 aaaacctatcaaactctctatcgtgaaggagaaaaggagcttataccattcgagaaaat  
K T Y Q I L Y R E G E K G A Y T I R E N  
481 ggtactgtctatacaccagatggtaaggcgacagactatcgcggtgtttagatcctggt  
G T V Y T P D G K A T D Y R V V V D P V  
541 aaaccagcctatagcgacaagggggatctatacaagggtaaccaattactaggcaatc  
K P A Y S D K G D L Y K G N Q L L G N I  
601 tacttcacaacaacaaaacttctccatttagaattgcccaaggatagctatctatggatg  
Y F T T N K T S P F R I A K D S Y L W M  
661 tcctacagtgatgacgacgggaagacatggtcagcgctcaagatattactccgatggtc  
S Y S D D D G K T W S A P Q D I T P M V  
721 aaagccgattggatgaaattcttgggtgtaggtcctggaacaggaattgtacttcggaat  
K A D W M K F L G V G P G T G I V L R N  
781 gggcctcacaagggacggattttgataccggtttatacgactaataatgtatctcactta  
G P H K G R I L I P V Y T T N N V S H L  
841 aatggctcgcaatcttctcgtatcatctattcagatgatcatggaaaaacttggcatgct  
N G S Q S S R I I Y S D D H G K T W H A  
901 ggagaagcgggtcaacgataaccgtcaggtagacgggtcaaaagatccactcttctacgatg  
G E A V N D N R Q V D G Q K I H S S T M  
961 aacaatagacgtgcgcaaaaatcacagaatcaacgggtggtacaactaacaatggagatgtt  
N N R R A Q N T E S T V V Q L N N G D V  
1021 aaactctttatgcgtggtttgactggagatcttcaggttgctacaagtaagacggagga  
K L F M R G L T G D L Q V A T S K D G G  
1081 gtgacttgggagaaggatatacaacggtatccacaggttaaagatgtctatgttcaaagt  
V T W E K D I K R Y P Q V K D V Y V Q M

1141 tctgctatccatacgatgcacgaaggaaaagaatacatcatcctcagtaatgcaggtgga  
 S A I H T M H E G K E Y I I L S N A G G  
 1201 ccgaaacgtgaaaatgggatgggtccacttggcacgtgtcgaagaaaatggtgagttgact  
 P K R E N G M V H L A R V E E N G E L T  
 1261 tggctcaaacacaatccaattcaaaaaggagagtttgcctataattcgctccaagaatta  
 W L K H N P I Q K G E F A Y N S L Q E L  
 1321 ggaaatggggagtatggcatcttgtatgaacatactgaaaaaggacaaaatgcctatacc  
 G N G E Y G I L Y E H T E K G Q N A Y T  
 1381 ctatcatttagaaaatftaatgggactttttgagcaaagatctgatttctcctaccgaa  
 L S F R K F N W D F L S K D L I S P T E  
 1441 gcgaaagtgaagcgaactagagagatgggcaaaggagtattggcttggagttcgactca  
 A K V K R T R E M G K G V I G L E F D S  
 1501 gaagtattggtc  
 E V L V

**Figure S28.** Nucleotide sequence and protein sequence of synthesized *S. pneumoniae* neuraminidase A (NanA)

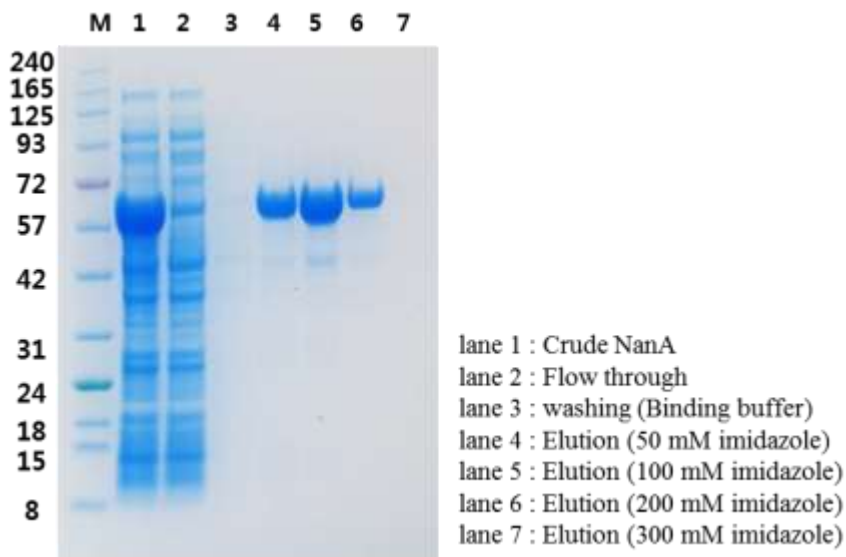

**Figure S29.** Expression and purification of *S. pneumoniae* NanA.

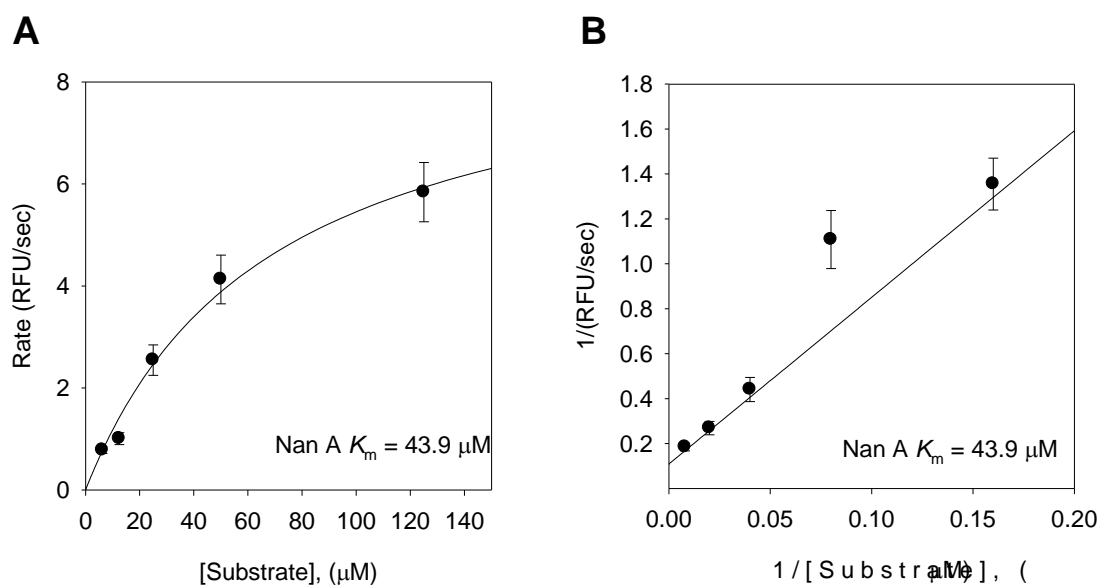

**Figure S30.** Michaelis-Menten plots (A) and Lineweaver-Burk plot (B) of *S. pneumoniae* NanA  $K_m$  values. The reaction was performed at various substrate concentrations to obtain enzyme  $K_m$  values. SigmaPlot was used to fit the kinetic data using Michaelis-Menten and Lineweaver-Burk double reciprocal plots.



[A] 4a

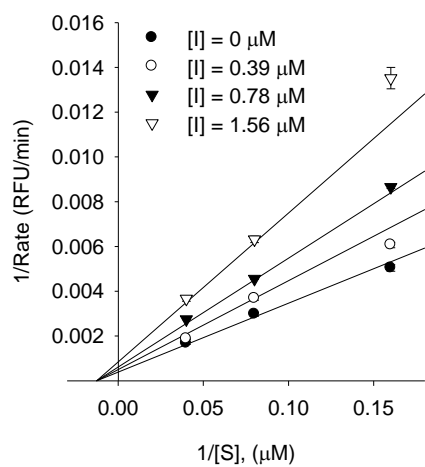

[B] 4e

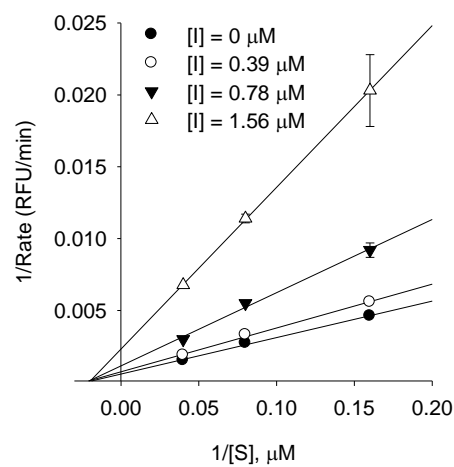

[C] 5q

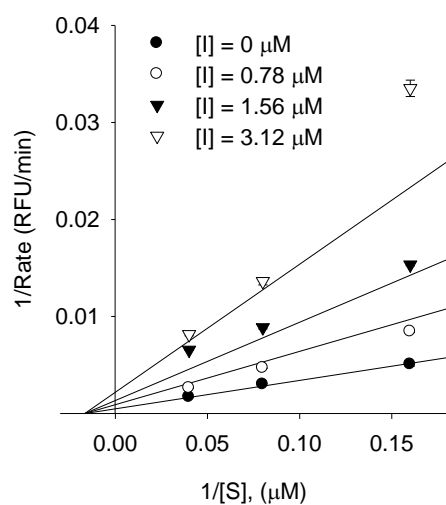

[D] 5e

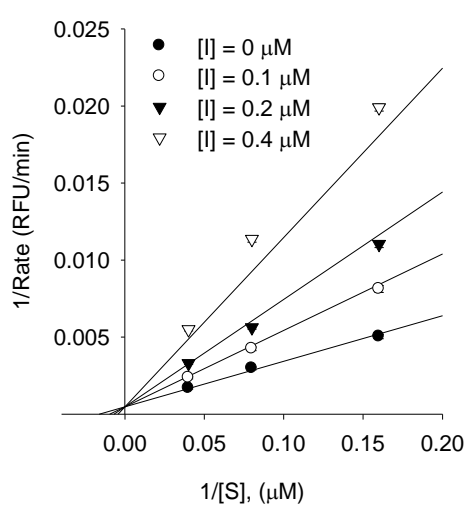

**Figure S31.** Graphical determination of the inhibition type for compounds **4a**, **4e**, **5q** and **5e**. Lineweaver-Burk (A-D) and Dixon (E-H) plots for the inhibitory activity of compounds **4a**, **4e**, **5q** and **5e**, respectively, against *S. pneumoniae* NanA hydrolysis activity in the presence of different substrate concentrations.

**[E] 4a**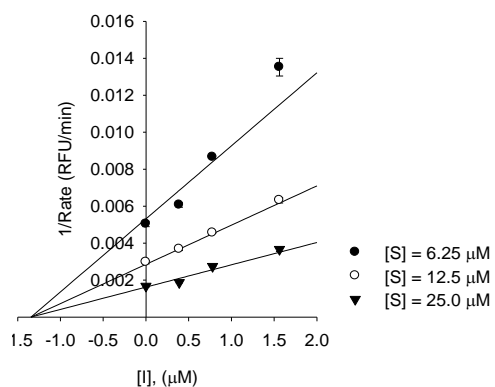**[F] 4e**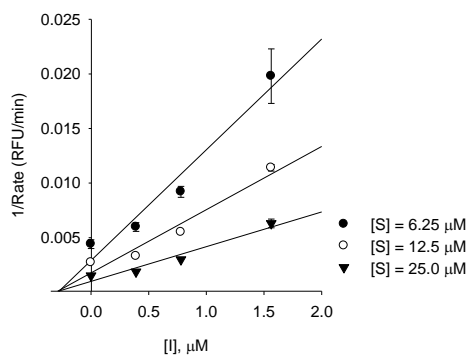**[G] 5q**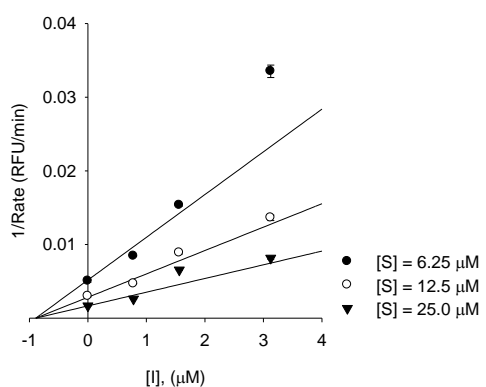**[H] 5e**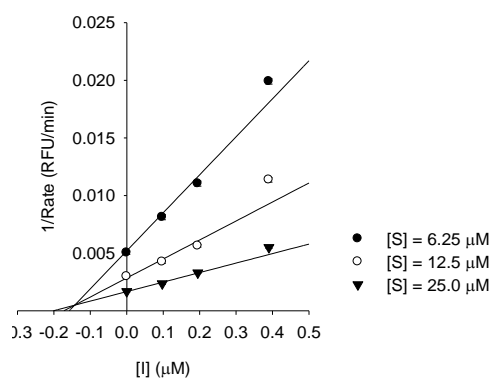

**Figure S31.** Graphical determination of the inhibition type for compounds **4a**, **4e**, **5q** and **5e**. Lineweaver-Burk (A-D) and Dixon (E-H) plots for the inhibitory activity of compounds **4a**, **4e**, **5q** and **5e**, respectively, against *S. pneumoniae* NanA hydrolysis activity in the presence of different substrate concentrations (continued).
